# Supplementary material for: Gene Silencing through CRISPR Interference in Mycoplasmas
Source: MDPI journal article supplement (doi:10.3390/microorganisms10061159), 2022-06-05
Supplement: s1 [file s1]

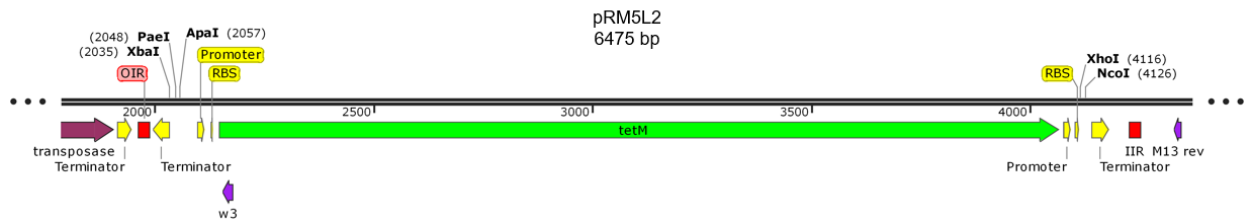

**Fig. S1 pRLM5L2 transposon vector scheme.** Promoter, RBS and terminator are yellow. OIR and IIR - inverted repeats for integration transposon into genome. W3 – primer, that is complementary to 5'-end of coding strand *tetM*, used for Sanger sequencing and validation position of transposon insertion.

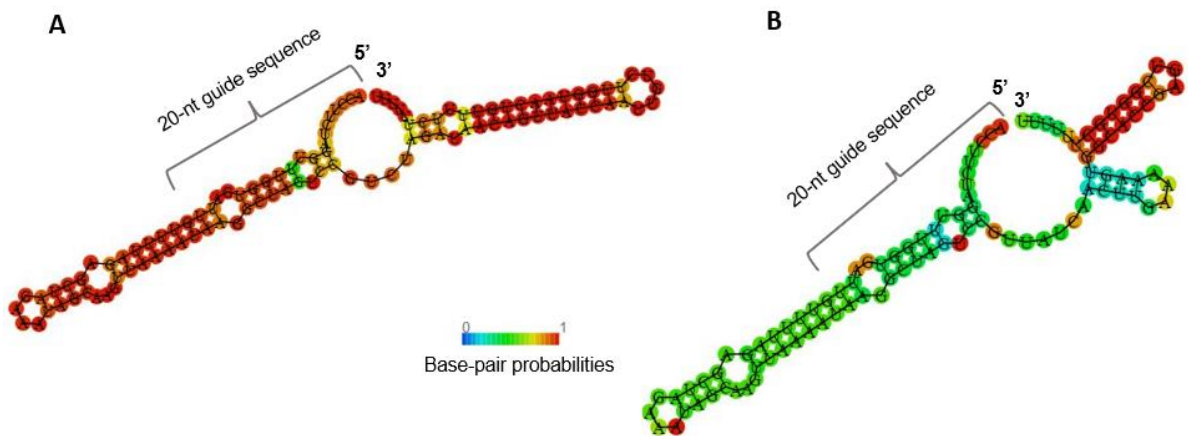

**Fig. S2 Predicted secondary structure of sgRNAs.** (A) sgRNA variant 1 for *fur* knockdown with terminator sequence provided in pRLM5L2 (located downstream of ApaI and XbaI sites). Guide sequence and gRNA exhibit a significant level of base pair interactions, compromising the formation of essential stem-loop structures (B) sgRNA variant 1 for *fur* knockdown with canonical *S. pyogenes* terminator. Guide sequence and gRNA exhibit weak interactions only. The color scale displays the base-pairing probability.

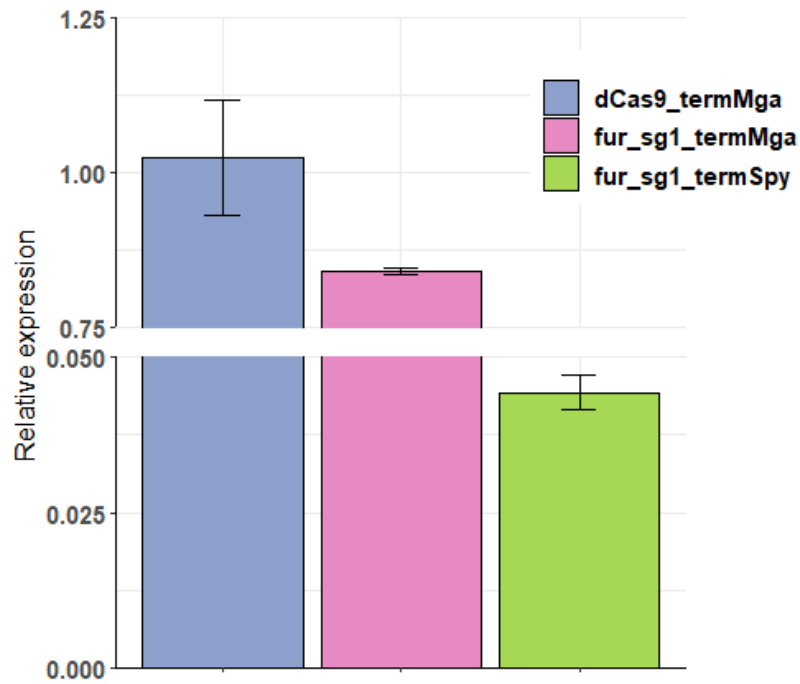

**Fig. S3 Effect of sgRNA terminator sequence on *fur* repression.** Quantitative RT-PCR analysis showing levels of *fur* in *dcas9* and *fur*-sgRNA1 containing AT-rich terminator (*fur\_sg1\_termMga*)-expressing transformants or Spy terminator sequence (*fur\_sg1\_termSpy*) compared to those in wild-type bacteria. dCas9 – transformants with expression only *dcas9*.

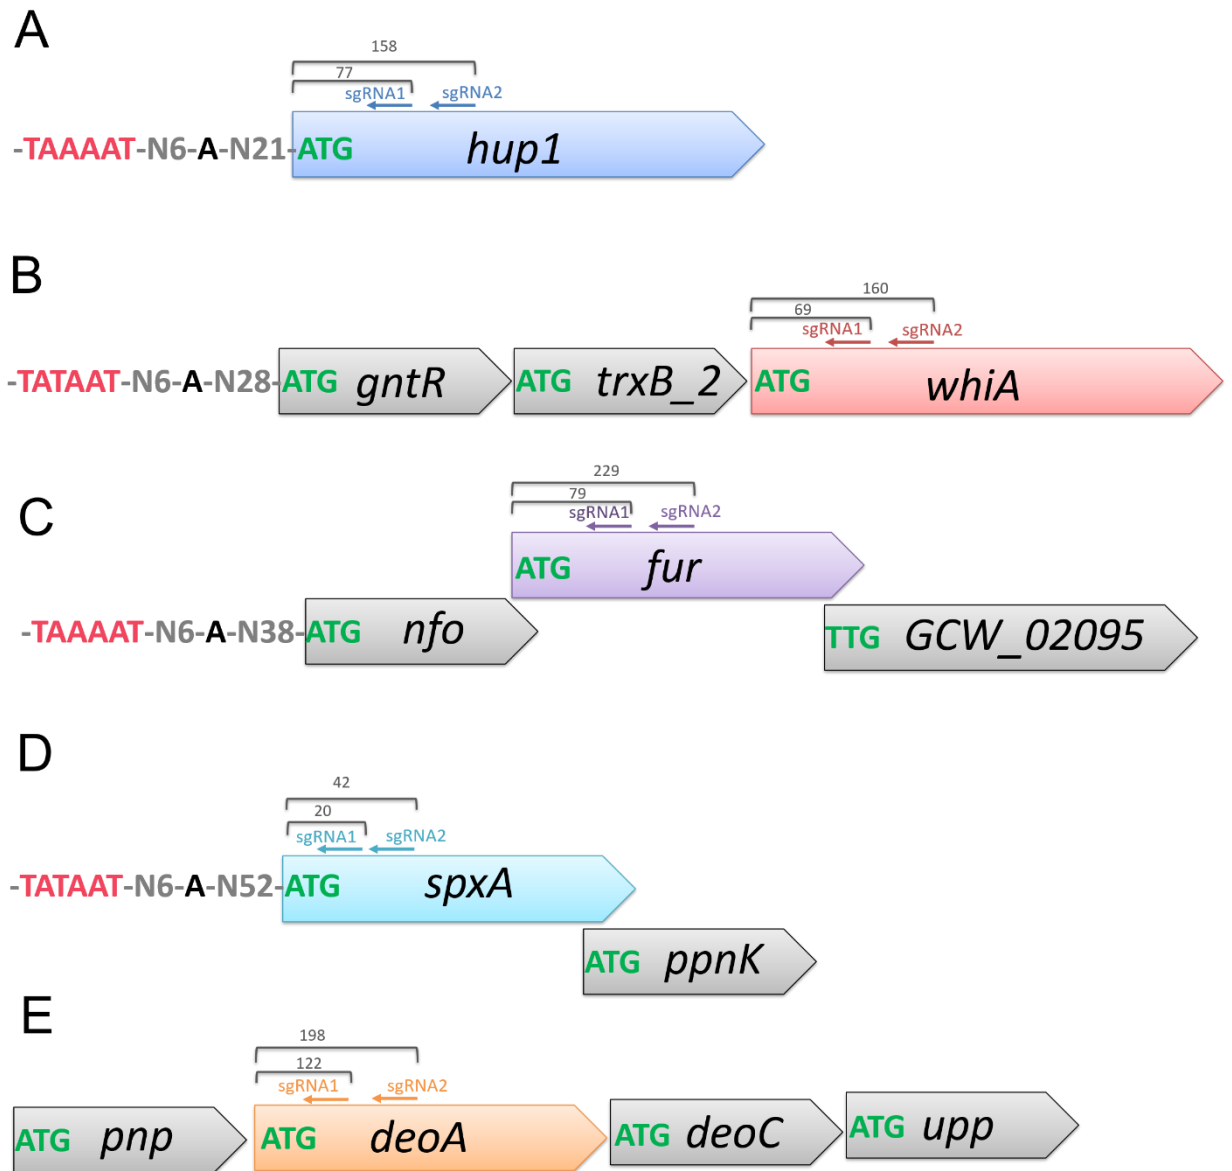

**Fig. S4 Structure of the operons, contained genes of interest.** Arrows indicate the position of 20-nt target sequences of designed sgRNAs; -10 box of promoter is red, initiator nucleotide is black, start codon is green. **(A)-(D)** *M. gallisepticum* targets, **(E)** *M. hominis* target. Our previous data of whole-genome mapping of transcription start sites for *M. gallisepticum* was used [Mazin P V., Fisunov GY, Gorbachev AY, Kapitskaya KY, Altukhov IA, Semashko TA, et al. Transcriptome analysis reveals novel regulatory mechanisms in a genome-reduced bacterium. Nucleic Acids Res. 2014;42(21):13254–68.].

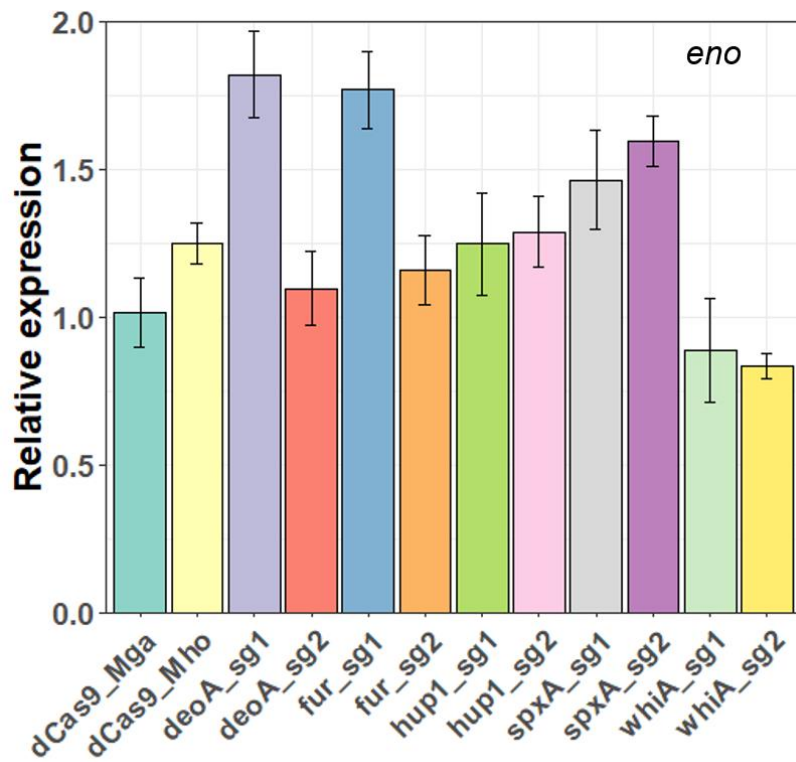

**Fig. S5 Enolase mRNA expression level in all transformants.** As a control, expression level of housekeeping *eno* in transformants relative of it in wild-type *M. gallisepticum* or *M. hominis* for dCas9-Mho, deoA\_sg1 and deoA\_sg2 transformants was measured.
