# Supplementary material for: Gene Silencing through CRISPR Interference in Mycoplasmas
Source: Microorganisms. 2022 Jun 5;10(6):1159. doi: 10.3390/microorganisms10061159 (PMC9229473; doi:10.3390/microorganisms10061159)
Supplement: Supplementary file 1 [file microorganisms-10-01159-s001.zip › table S1-S2.xlsx]

## Sheet: TableS1-Oligonucleotides
Name	Sequence (5'-3')
Mutagenesis and cloning dcas9
dCas9_mut_1_F	TAGTATGGATAAGAAATACTCAATAGGACTGGCTATTGGC
dCas9_mut_1_R	AGCATCGACATCATAATCACTCAGCCTATTAATATC
dCas9_mut2_F	GATTATGATGTCGATGCTATTGTTCCACAAAGTTTCCTT
dCas9_mut2_R	GATTTTCTGCAGATGTCTTAGTCACCTCCCAGCTG
dCas9_mut_1a_F	AACTGAAAGGAGGATACTAGTATGGATAAGAAATACTCAATAGGAC
Assembly sgRNAs
sg_1	CTAGAAAAAAAGCACCGACTCGGTGCCACTTTTTCAAGTT
sg_7	CGAGTCGGTGCTTTTTTT
sg_6	AAAATAAGGCTAGTCCGTTATCAACTTGAAAAAGTGGCAC
sg_2	GATAACGGACTAGCCTTATTTTAACTTGCTATTTCTAGCTCT
sgfur_tg1_5	TTTGGTGATTGTTTTAGAGCTAGAAATAGCAAGTT
sgfur_tg1_3	AAAACAATCACCAAACCTAGAAGGTTGAAATATTATAACATAGGGCC
sgfur_tg1_4	CTATGTTATAATATTTCAACCTTCTAGG
sgfur_tg2_5	AAGATTGAGTGTTTTAGAGCTAGAAATAGCAAGTT
sgfur_tg2_3	AAAACACTCAATCTTGTTGATTCGTTGAAATATTATAACATAGGGCC
sgfur_tg2_4	CTATGTTATAATATTTCAACGAATCAAC
sghup1_tg1_5	CCTTAACAAGTTTGTTTTAGAGCTAGAAATAGCAAGTT
sghup1_tg1_3	AAAACAAACTTGTTAAGGCTTGTTTTGAAATATTATAACATAGGGCC
sghup1_tg1_4	CTATGTTATAATATTTCAAAACAAG
sghup1_tg2_5	TACCAAGTTCGTTTTAGAGCTAGAAATAGCAAGTT
sghup1_tg2_3	AAAACGAACTTGGTACTTTTAGAGTTGAAATATTATAACATAGGGCC
sghup1_tg2_4	CTATGTTATAATATTTCAACTCTAAAAG
sgwhiA_tg1_3	AAAACCGACTTGTTGGTGCAAAATGTGAAATATTATAACATAGGGCC
sgwhiA_tg1_4	CTATGTTATAATATTTCACATTTTGCAC
sgwhiA_tg1_5	CAACAAGTCGGTTTTAGAGCTAGAAATAGCAAGTT
sgwhiA_tg2_3	AAAACACACCCAAAAACGATCATCTTGAAATATTATAACATAGGGCC
sgwhiA_tg2_4	CTATGTTATAATATTTCAAGATGATCGT
sgwhiA_tg2_5	TTTTGGGTGTGTTTTAGAGCTAGAAATAGCAAGTT
sgspxA_tg1_5	ATTGTTCGTCGTTTTAGAGCTAGAAATAGCAAGTT
sgspxA_tg1_3	AAAACGACGAACAATATAGTATTATTGAAATATTATAACATAGGGCC
sgspxA_tg1_4	CTATGTTATAATATTTCAATAATACTAT
sgspxA_tg2_5	TTATCTGTCAGTTTTAGAGCTAGAAATAGCAAGTT
sgspxA_tg2_3	AAAACTGACAGATAATCAAAATAACTGAAATATTATAACATAGGGCC
sgspxA_tg2_4	CTATGTTATAATATTTCAGTTATTTTGA
sgdeoA_tg1_5	CTTGGTAGTCGTTTTAGAGCTAGAAATAGCAAGTT
sgdeoA_tg1_3	AAAACGACTACCAAGCTGCCGCTTTTGAAATATTATAACATAGGGCC
sgdeoA_tg1_4	CTATGTTATAATATTTCAAAAGCGGCAG
sgdeoA_tg2_5	ATCATAGCGTGTTTTAGAGCTAGAAATAGCAAGTT
sgdeoA_tg2_3	AAAACACGCTATGATGCATTCAGGCTGAAATATTATAACATAGGGCC
sgdeoA_tg2_4	CTATGTTATAATATTTCAGCCTGAATGC
Primers for RT-qPCR
tuf_mga_RT_F	TCAAAATCGTCACTATGCACAC
tuf_mga_RT_R	TCTGATTACTGGAGTGTTATCACC
eno_mga_RT_F	GCGATCTTAGCAGTATCAATGG
eno_mga_RT_R	ACCTTCATCACCTTTGTTAGTA
fur_mga_RT_F	AATACCGAATCACCAAACCTAG
fur_mga_RT_R	ATGTTTTTGGGAATAATAATCGTAC
hup1_mga_RT_F	AGGCGGAATTCTAGTTTGTG
hup1_mga_RT_R	ATTATCGCTGAATGTACTGGAG
whiA_mga_RT_F	CAAGAGGTTAAAAGTGAGATCTGTG
whiA_mga_RT_R	GCTGTTGTTCTTCTAGTTCGTG
spxA_mga_RT_F	TCATGTATTGGCTGTACGAGAG
spxA_mga_RT_R	CCATCAATCTTTTAGGAATCCCTG
nfo_mga_RT_F	ATTATGTTGTTCACGCTCCT
nfo_mga_RT_R	ATCAGCCATTGTTTCAAGAC
GCW_02095_mga_RT_F	CGATAAGTTAGTAGCAGCACAG
GCW_02095_mga_RT_R	TTGACATACTGAATGATCCCAC
msrA_mga_RT_F	AAATCCGCTACGATACTGTG
msrA_mga_RT_R	TTATGCCAACTACAAACCAG
msrB_mga_RT_F	GGGATCTATGTTGATATTACAACTGG
msrB_mga_RT_R	GCGATAAACTCTTCATAGCCTG
osmC_mga_RT_F	AGCTAAAGTTGGTAGAGAAGGTC
osmC_mga_RT_R	ATTCTTTAGCCTTAGCTTCTGG
osmC2_mga_RT_F	ATTCATCAGCAACTAAAGTACC
osmC2_mga_RT_R	TCATCAATTACGATTCTTCCAG
rpsJ-rplC_mga_RT_F	TTAAACAAGCCGCAATTAGGTC
rpsJ-rplC_mga_RT_R	TACCCTTCATAACTCTTTGAGC
dcas9_RT_F	TTAGGGATAAGCAATCTGGCAA
dcas9_RT_R	CTATCATCATGGATGAGCTGCA
tuf_mho_RT_F	TATTGCTACGTGGAATTGACAG
tuf_mho_RT_R	CCTTCACGAATAGAGAACTTGG
eno_mho_RT_F	CCAAGTAGCATACAAAATGCCA
eno_mho_RT_R	CTGAAGTAGCTGGATTATATCCTG
deoA_mho_RT_F	TGATAAACACTCAACAGGAGGA
deoA_mho_RT_R	CAATGGAATTGATTGAACGGTA

## Sheet: TableS2-Proteomic analysis
					p.adj		Log2FC
	Protein_Name	Protein_ID	Gene	Annotation	dCas9_1_vs_Mga_WT	dCas9_3_vs_Mga_WT	dCas9_1_vs_Mga_WT	dCas9_3_vs_Mga_WT
1	dCas9_Spyogenes	dCas9_Spyogenes	dCas9_Spyogenes	Dead Cas9 Streptococcus pyogenes	1.59e-14	3.21e-14	11.4	12.5
2	TetM	TetM	tetM	Tetracycline resistance protein	6.05e-05	0.000249	10.7	11.5
3	tr|A0A0F6CJT7|A0A0F6CJT7_MYCGL	tr|A0A0F6CJT7|A0A0F6CJT7_MYCGL	GCW_00170	Lipoprotein	0.0133	2.12e-05	-0.399	-0.68
4	tr|A0A0F6CJX6|A0A0F6CJX6_MYCGL	tr|A0A0F6CJX6|A0A0F6CJX6_MYCGL	ldh	Lactate dehydrogenase	0.469	0.0222	-0.278	-0.599
5	tr|A0A0F6CJZ7|A0A0F6CJZ7_MYCGL	tr|A0A0F6CJZ7|A0A0F6CJZ7_MYCGL	GCW_00525	Peptidase S8	0.0129	0.00993	-1.06	-1.26
6	tr|A0A0F6CK19|A0A0F6CK19_MYCGL	tr|A0A0F6CK19|A0A0F6CK19_MYCGL	GCW_00685	Peptidase U32	0.0341	0.245	-0.644	-0.529
7	tr|A0A0F6CK55|A0A0F6CK55_MYCGL	tr|A0A0F6CK55|A0A0F6CK55_MYCGL	GCW_00960	Peptidase S8	2.3e-07	0.275	-1.02	-0.422
8	tr|A0A0F6CK88|A0A0F6CK88_MYCGL	tr|A0A0F6CK88|A0A0F6CK88_MYCGL	GCW_01170	VlhA.3.08 variable lipoprotein family protein	1.59e-14	0.855	-2.41	-0.216
9	tr|A0A0F6CK89|A0A0F6CK89_MYCGL	tr|A0A0F6CK89|A0A0F6CK89_MYCGL	GCW_01175	VlhA.1.01 variable lipoprotein family protein	0.000427	0.912	-2.92	0.102
10	tr|A0A0F6CK90|A0A0F6CK90_MYCGL	tr|A0A0F6CK90|A0A0F6CK90_MYCGL	GCW_01195	VlhA.1.01 variable lipoprotein family protein	3.35e-05	7.24e-07	1.61	-2.13
11	tr|A0A0F6CK99|A0A0F6CK99_MYCGL	tr|A0A0F6CK99|A0A0F6CK99_MYCGL	GCW_01250	Uncharacterized protein	4.38e-06	0.00227	-0.828	-0.708
12	tr|A0A0F6CKC0|A0A0F6CKC0_MYCGL	tr|A0A0F6CKC0|A0A0F6CKC0_MYCGL	mgtA	Cation transport ATPase	0.00325	0.0772	0.59	0.499
13	tr|A0A0F6CKI1|A0A0F6CKI1_MYCGL	tr|A0A0F6CKI1|A0A0F6CKI1_MYCGL	GCW_01790	Amino acid permease	2.01e-10	1.29e-11	-1.46	-1.76
14	tr|A0A0F6CKK5|A0A0F6CKK5_MYCGL	tr|A0A0F6CKK5|A0A0F6CKK5_MYCGL	GCW_01930	VlhA.1.01 variable lipoprotein family protein	1.09e-11	0.524	1.86	0.479
15	tr|A0A0F6CKK6|A0A0F6CKK6_MYCGL	tr|A0A0F6CKK6|A0A0F6CKK6_MYCGL	GCW_01940	VlhA.1.01 variable lipoprotein family protein	1.59e-14	3.21e-14	1.87	-2.32
16	tr|A0A0F6CKK7|A0A0F6CKK7_MYCGL	tr|A0A0F6CKK7|A0A0F6CKK7_MYCGL	GCW_01960	VlhA.1.01 variable lipoprotein family protein	1.59e-14	0.886	-2.1	0.0959
17	tr|A0A0F6CKQ4|A0A0F6CKQ4_MYCGL	tr|A0A0F6CKQ4|A0A0F6CKQ4_MYCGL	mraZ	Transcriptional regulator MraZ	0.000288	6.58e-06	-0.603	-0.822
18	tr|A0A0F6CKR8|A0A0F6CKR8_MYCGL	tr|A0A0F6CKR8|A0A0F6CKR8_MYCGL	GCW_02355	Type I restriction endonuclease subunit M	1.59e-14	0.913	-3.28	-0.0359
19	tr|A0A0F6CKR9|A0A0F6CKR9_MYCGL	tr|A0A0F6CKR9|A0A0F6CKR9_MYCGL	GCW_02360	Type I restriction endonuclease subunit S	1.59e-14	0.921	-4.3	-0.000302
20	tr|A0A0F6CKS0|A0A0F6CKS0_MYCGL	tr|A0A0F6CKS0|A0A0F6CKS0_MYCGL	GCW_02365	Type I restriction enzyme R Protein	5.08e-06	0.772	-0.942	0.215
21	tr|A0A0F6CKS1|A0A0F6CKS1_MYCGL	tr|A0A0F6CKS1|A0A0F6CKS1_MYCGL	GCW_02390	VlhA.1.01 variable lipoprotein family protein	0.685	3.21e-14	0.247	-2.63
22	tr|A0A0F6CKS2|A0A0F6CKS2_MYCGL	tr|A0A0F6CKS2|A0A0F6CKS2_MYCGL	GCW_02405	VlhA.1.02 variable lipoprotein family protein	0.0831	0.00321	-0.707	-1.15
23	tr|A0A0F6CKU9|A0A0F6CKU9_MYCGL	tr|A0A0F6CKU9|A0A0F6CKU9_MYCGL	GCW_02595	Permease	0.0112	0.0708	1.24	1.18
24	tr|A0A0F6CKX6|A0A0F6CKX6_MYCGL	tr|A0A0F6CKX6|A0A0F6CKX6_MYCGL	acoB	Pyruvate dehydrogenase E1 subunit beta	0.0207	0.00978	-0.473	-0.592
25	tr|A0A0F6CKX8|A0A0F6CKX8_MYCGL	tr|A0A0F6CKX8|A0A0F6CKX8_MYCGL	GCW_02755	NADH oxidase	0.0935	0.0129	-0.541	-0.8
26	tr|A0A0F6CL10|A0A0F6CL10_MYCGL	tr|A0A0F6CL10|A0A0F6CL10_MYCGL	dppC	Peptide ABC transporter permease	0.00771	0.128	0.605	0.503
27	tr|A0A0F6CL33|A0A0F6CL33_MYCGL	tr|A0A0F6CL33|A0A0F6CL33_MYCGL	GCW_03095	Amino acid permease	0.0415	0.0253	0.626	0.774
28	tr|A0A0F6CL62|A0A0F6CL62_MYCGL	tr|A0A0F6CL62|A0A0F6CL62_MYCGL	prsA	Ribose-phosphate pyrophosphokinase	0.0115	0.0279	-0.673	-0.717
29	tr|A0A0F6CL72|A0A0F6CL72_MYCGL	tr|A0A0F6CL72|A0A0F6CL72_MYCGL	deoC_2	Deoxyribose-phosphate aldolase	0.391	0.0485	-0.323	-0.591
30	tr|A0A0F6CL77|A0A0F6CL77_MYCGL	tr|A0A0F6CL77|A0A0F6CL77_MYCGL	GCW_03335	Variably expressed lipoprotein and hemagglutinin(VlhA) family protein	0.00551	0.783	1.14	0.361
31	tr|A0A0F6CL79|A0A0F6CL79_MYCGL	tr|A0A0F6CL79|A0A0F6CL79_MYCGL	GCW_03350	VlhA.3.03 variable lipoprotein family protein	1.59e-14	0.864	-3.72	0.166
32	tr|A0A0F6CL82|A0A0F6CL82_MYCGL	tr|A0A0F6CL82|A0A0F6CL82_MYCGL	GCW_03380	Bmp domain-containing protein	1.29e-11	3.21e-14	-1.25	-1.68
33	tr|A0A0F6CLA3|A0A0F6CLA3_MYCGL	tr|A0A0F6CLA3|A0A0F6CLA3_MYCGL	GCW_03490	HAD family hydrolase	0.132	0.00457	-0.341	-0.59
34	tr|A0A0F6CLD0|A0A0F6CLD0_MYCGL	tr|A0A0F6CLD0|A0A0F6CLD0_MYCGL	secE	Preprotein translocase subunit SecE	0.0275	0.472	0.681	0.438
35	tr|A0A0F6CLD4|A0A0F6CLD4_MYCGL	tr|A0A0F6CLD4|A0A0F6CLD4_MYCGL	GCW_03660	Uncharacterized protein	1e-06	0.0103	2.12	1.52
36	tr|A0A0F6CLD7|A0A0F6CLD7_MYCGL	tr|A0A0F6CLD7|A0A0F6CLD7_MYCGL	atpA	F0F1 ATP synthase subunit alpha	4.54e-05	0.375	0.644	0.295
37	tr|A0A0F6CLD8|A0A0F6CLD8_MYCGL	tr|A0A0F6CLD8|A0A0F6CLD8_MYCGL	atpD_2	F0F1 ATP synthase subunit beta	1.59e-14	5.13e-14	2.17	1.95
38	tr|A0A0F6CLD9|A0A0F6CLD9_MYCGL	tr|A0A0F6CLD9|A0A0F6CLD9_MYCGL	GCW_03685	DUF31 domain-containing protein	9.31e-10	0.000138	1.26	0.992
39	tr|A0A0F6CLE0|A0A0F6CLE0_MYCGL	tr|A0A0F6CLE0|A0A0F6CLE0_MYCGL	GCW_03690	DUF31 putative peptidase	0.000375	0.783	0.712	0.189
40	tr|A0A0F6CLG7|A0A0F6CLG7_MYCGL	tr|A0A0F6CLG7|A0A0F6CLG7_MYCGL	GCW_03860	Uncharacterized protein	0.9	8.76e-13	-0.0786	-3.71
41	tr|A0A0F6CLH0|A0A0F6CLH0_MYCGL	tr|A0A0F6CLH0|A0A0F6CLH0_MYCGL	GCW_03885	M-domain IgG blocking protein	0.0136	0.233	1.18	0.895
42	tr|A0A0F6CLN9|A0A0F6CLN9_MYCGL	tr|A0A0F6CLN9|A0A0F6CLN9_MYCGL	GCW_02370	Uncharacterized protein	0.000563	0.878	-0.799	0.106
43	tr|A0A0F6CLV9|A0A0F6CLV9_MYCGL	tr|A0A0F6CLV9|A0A0F6CLV9_MYCGL	vlhA.3.07	VlhA.3.07	0.00186	5.86e-12	1.09	-2.35
44	tr|A0A0F6CLY0|A0A0F6CLY0_MYCGL	tr|A0A0F6CLY0|A0A0F6CLY0_MYCGL	vlhA	Mycoplasma hemagglutinin VlhA	0.761	8.88e-08	0.683	-4.54
45	tr|A0A0F6CLY2|A0A0F6CLY2_MYCGL	tr|A0A0F6CLY2|A0A0F6CLY2_MYCGL	vlhA	Mycoplasma hemagglutinin VlhA	0.0216	5.02e-05	1.73	-2.98
46	tr|A0A0F6CM03|A0A0F6CM03_MYCGL	tr|A0A0F6CM03|A0A0F6CM03_MYCGL	vlhA	VlhA	0.468	0.000397	0.563	1.62
47	tr|A0A0F6CJR4|A0A0F6CJR4_MYCGL	tr|A0A0F6CJR4|A0A0F6CJR4_MYCGL	parA	Chromosome partitioning protein ParA	0.886	0.616	0.0465	0.231
48	tr|A0A0F6CJR5|A0A0F6CJR5_MYCGL	tr|A0A0F6CJR5|A0A0F6CJR5_MYCGL	dnaA	Chromosomal replication initiator protein DnaA	0.902	0.836	0.0373	0.191
49	tr|A0A0F6CJR6|A0A0F6CJR6_MYCGL	tr|A0A0F6CJR6|A0A0F6CJR6_MYCGL	rpmH	50S ribosomal protein L34	0.513	0.615	0.632	0.647
50	tr|A0A0F6CJR7|A0A0F6CJR7_MYCGL	tr|A0A0F6CJR7|A0A0F6CJR7_MYCGL	rnpA	Ribonuclease P protein component	0.904	0.444	0.0313	0.457
51	tr|A0A0F6CJR8|A0A0F6CJR8_MYCGL	tr|A0A0F6CJR8|A0A0F6CJR8_MYCGL	yidC	Preprotein translocase subunit YidC	0.893	0.875	-0.0856	0.185
52	tr|A0A0F6CJR9|A0A0F6CJR9_MYCGL	tr|A0A0F6CJR9|A0A0F6CJR9_MYCGL	ksgA	Ribosomal RNA small subunit methyltransferase A	0.76	0.768	0.244	0.286
53	tr|A0A0F6CJS0|A0A0F6CJS0_MYCGL	tr|A0A0F6CJS0|A0A0F6CJS0_MYCGL	argS	Arginine--tRNA ligase	0.885	0.768	0.0501	-0.175
54	tr|A0A0F6CJS1|A0A0F6CJS1_MYCGL	tr|A0A0F6CJS1|A0A0F6CJS1_MYCGL	mnuA	Nuclease	0.91	0.916	-0.0226	-0.0366
55	tr|A0A0F6CJS3|A0A0F6CJS3_MYCGL	tr|A0A0F6CJS3|A0A0F6CJS3_MYCGL	glpO	Glycerol-3-phosphate dehydrogenase	0.727	0.911	0.155	-0.0235
56	tr|A0A0F6CJS4|A0A0F6CJS4_MYCGL	tr|A0A0F6CJS4|A0A0F6CJS4_MYCGL	GCW_00080	Putative peptidase (DUF31)	0.136	0.58	0.341	0.244
57	tr|A0A0F6CJS5|A0A0F6CJS5_MYCGL	tr|A0A0F6CJS5|A0A0F6CJS5_MYCGL	GCW_00085	Ferritin	0.49	0.231	-0.8	-1.21
58	tr|A0A0F6CJS6|A0A0F6CJS6_MYCGL	tr|A0A0F6CJS6|A0A0F6CJS6_MYCGL	rnj	Ribonuclease J	0.757	0.75	0.146	0.179
59	tr|A0A0F6CJS7|A0A0F6CJS7_MYCGL	tr|A0A0F6CJS7|A0A0F6CJS7_MYCGL	GCW_00110	ABC transporter permease	0.868	0.856	0.0981	0.149
60	tr|A0A0F6CJS8|A0A0F6CJS8_MYCGL	tr|A0A0F6CJS8|A0A0F6CJS8_MYCGL	GCW_00115	ABC transporter ATP-binding protein	0.91	0.92	0.0131	-0.00427
61	tr|A0A0F6CJT0|A0A0F6CJT0_MYCGL	tr|A0A0F6CJT0|A0A0F6CJT0_MYCGL	hpt	Hypoxanthine phosphoribosyltransferase	0.904	0.914	0.0394	-0.0375
62	tr|A0A0F6CJT1|A0A0F6CJT1_MYCGL	tr|A0A0F6CJT1|A0A0F6CJT1_MYCGL	ftsH	ATP-dependent zinc metalloprotease FtsH	0.802	0.65	-0.156	-0.285
63	tr|A0A0F6CJT2|A0A0F6CJT2_MYCGL	tr|A0A0F6CJT2|A0A0F6CJT2_MYCGL	GCW_00145	Dihydroxyacetone kinase	0.517	0.594	-0.457	-0.485
64	tr|A0A0F6CJT3|A0A0F6CJT3_MYCGL	tr|A0A0F6CJT3|A0A0F6CJT3_MYCGL	GCW_00150	Putative conserved protein, contains RING Zn-finger domain	0.885	0.889	0.0974	-0.125
65	tr|A0A0F6CJT4|A0A0F6CJT4_MYCGL	tr|A0A0F6CJT4|A0A0F6CJT4_MYCGL	fruB	Phosphocarrier protein HPr	0.881	0.827	-0.112	-0.271
66	tr|A0A0F6CJT5|A0A0F6CJT5_MYCGL	tr|A0A0F6CJT5|A0A0F6CJT5_MYCGL	tktA_1	Transketolase	0.844	0.878	0.107	0.0916
67	tr|A0A0F6CJT6|A0A0F6CJT6_MYCGL	tr|A0A0F6CJT6|A0A0F6CJT6_MYCGL	secA	Protein translocase subunit SecA	0.792	0.832	0.142	0.14
68	tr|A0A0F6CJT8|A0A0F6CJT8_MYCGL	tr|A0A0F6CJT8|A0A0F6CJT8_MYCGL	GCW_00175	Nuclease	0.506	0.193	-0.297	-0.482
69	tr|A0A0F6CJT9|A0A0F6CJT9_MYCGL	tr|A0A0F6CJT9|A0A0F6CJT9_MYCGL	ugpC	sn-glycerol-3-phosphate ABC transporterATP-binding protein	0.289	0.19	-0.309	-0.405
70	tr|A0A0F6CJU0|A0A0F6CJU0_MYCGL	tr|A0A0F6CJU0|A0A0F6CJU0_MYCGL	ugpA	ABC transporter permease	0.795	0.693	-0.548	-0.894
71	tr|A0A0F6CJU1|A0A0F6CJU1_MYCGL	tr|A0A0F6CJU1|A0A0F6CJU1_MYCGL	ugpE	ABC transporter permease	0.908	0.887	0.0471	0.26
72	tr|A0A0F6CJU2|A0A0F6CJU2_MYCGL	tr|A0A0F6CJU2|A0A0F6CJU2_MYCGL	GCW_00200	Mgp-operon protein 1	0.88	0.902	0.115	-0.088
73	tr|A0A0F6CJU3|A0A0F6CJU3_MYCGL	tr|A0A0F6CJU3|A0A0F6CJU3_MYCGL	uvrB	UvrABC system protein B	0.871	0.893	0.0653	0.0568
74	tr|A0A0F6CJU4|A0A0F6CJU4_MYCGL	tr|A0A0F6CJU4|A0A0F6CJU4_MYCGL	pstS	Phosphate ABC transporter substrate-bindingprotein	0.905	0.897	-0.0325	0.0942
75	tr|A0A0F6CJU5|A0A0F6CJU5_MYCGL	tr|A0A0F6CJU5|A0A0F6CJU5_MYCGL	pstA	Phosphate transport system permease protein PstA	0.803	0.865	0.498	-0.385
76	tr|A0A0F6CJU6|A0A0F6CJU6_MYCGL	tr|A0A0F6CJU6|A0A0F6CJU6_MYCGL	pstB	Phosphate import ATP-binding protein PstB	0.91	0.853	-0.0099	-0.128
77	tr|A0A0F6CJU7|A0A0F6CJU7_MYCGL	tr|A0A0F6CJU7|A0A0F6CJU7_MYCGL	phoU	Phosphate ABC transporter	0.76	0.894	0.277	0.107
78	tr|A0A0F6CJU8|A0A0F6CJU8_MYCGL	tr|A0A0F6CJU8|A0A0F6CJU8_MYCGL	nrdA	Ribonucleoside-diphosphate reductase	0.496	0.00539	-0.215	-0.543
79	tr|A0A0F6CJU9|A0A0F6CJU9_MYCGL	tr|A0A0F6CJU9|A0A0F6CJU9_MYCGL	nrdI	Protein NrdI	0.796	0.278	-0.363	-0.979
80	tr|A0A0F6CJV0|A0A0F6CJV0_MYCGL	tr|A0A0F6CJV0|A0A0F6CJV0_MYCGL	nrdF	Ribonucleoside-diphosphate reductase	0.571	0.108	-0.284	-0.565
81	tr|A0A0F6CJV1|A0A0F6CJV1_MYCGL	tr|A0A0F6CJV1|A0A0F6CJV1_MYCGL	thyA	Thymidylate synthase	0.904	0.806	-0.0343	-0.255
82	tr|A0A0F6CJV3|A0A0F6CJV3_MYCGL	tr|A0A0F6CJV3|A0A0F6CJV3_MYCGL	rpsJ	30S ribosomal protein S10	0.873	0.911	0.0758	0.0282
83	tr|A0A0F6CJV4|A0A0F6CJV4_MYCGL	tr|A0A0F6CJV4|A0A0F6CJV4_MYCGL	rplC	50S ribosomal protein L3	0.81	0.766	0.133	0.193
84	tr|A0A0F6CJV5|A0A0F6CJV5_MYCGL	tr|A0A0F6CJV5|A0A0F6CJV5_MYCGL	rplD	50S ribosomal protein L4	0.871	0.879	0.0835	0.099
85	tr|A0A0F6CJV6|A0A0F6CJV6_MYCGL	tr|A0A0F6CJV6|A0A0F6CJV6_MYCGL	rplW	50S ribosomal protein L23	0.902	0.716	0.0335	0.285
86	tr|A0A0F6CJV7|A0A0F6CJV7_MYCGL	tr|A0A0F6CJV7|A0A0F6CJV7_MYCGL	rplB	50S ribosomal protein L2	0.813	0.648	0.276	0.536
87	tr|A0A0F6CJV8|A0A0F6CJV8_MYCGL	tr|A0A0F6CJV8|A0A0F6CJV8_MYCGL	rpsS	30S ribosomal protein S19	0.838	0.895	0.162	0.0914
88	tr|A0A0F6CJV9|A0A0F6CJV9_MYCGL	tr|A0A0F6CJV9|A0A0F6CJV9_MYCGL	rplV	50S ribosomal protein L22	0.827	0.456	-0.229	-0.619
89	tr|A0A0F6CJW0|A0A0F6CJW0_MYCGL	tr|A0A0F6CJW0|A0A0F6CJW0_MYCGL	rpsC	30S ribosomal protein S3	0.869	0.898	-0.106	-0.0752
90	tr|A0A0F6CJW1|A0A0F6CJW1_MYCGL	tr|A0A0F6CJW1|A0A0F6CJW1_MYCGL	rplP	50S ribosomal protein L16	0.679	0.573	0.215	0.3
91	tr|A0A0F6CJW2|A0A0F6CJW2_MYCGL	tr|A0A0F6CJW2|A0A0F6CJW2_MYCGL	rpmC	50S ribosomal protein L29	0.48	0.427	0.287	0.353
92	tr|A0A0F6CJW3|A0A0F6CJW3_MYCGL	tr|A0A0F6CJW3|A0A0F6CJW3_MYCGL	rpsQ	30S ribosomal protein S17	0.444	0.239	0.487	0.693
93	tr|A0A0F6CJW4|A0A0F6CJW4_MYCGL	tr|A0A0F6CJW4|A0A0F6CJW4_MYCGL	rplN	50S ribosomal protein L14	0.618	0.596	0.31	0.376
94	tr|A0A0F6CJW5|A0A0F6CJW5_MYCGL	tr|A0A0F6CJW5|A0A0F6CJW5_MYCGL	rplX	50S ribosomal protein L24	0.722	0.875	-0.5	-0.254
95	tr|A0A0F6CJW6|A0A0F6CJW6_MYCGL	tr|A0A0F6CJW6|A0A0F6CJW6_MYCGL	rplE	50S ribosomal protein L5	0.909	0.818	0.0113	0.15
96	tr|A0A0F6CJW7|A0A0F6CJW7_MYCGL	tr|A0A0F6CJW7|A0A0F6CJW7_MYCGL	rpsN	30S ribosomal protein S14 type Z	0.832	0.91	0.259	0.0651
97	tr|A0A0F6CJW8|A0A0F6CJW8_MYCGL	tr|A0A0F6CJW8|A0A0F6CJW8_MYCGL	rpsH	30S ribosomal protein S8	0.154	0.19	0.55	0.619
98	tr|A0A0F6CJW9|A0A0F6CJW9_MYCGL	tr|A0A0F6CJW9|A0A0F6CJW9_MYCGL	rplF	50S ribosomal protein L6	0.823	0.838	0.109	0.122
99	tr|A0A0F6CJX0|A0A0F6CJX0_MYCGL	tr|A0A0F6CJX0|A0A0F6CJX0_MYCGL	rplR	50S ribosomal protein L18	0.893	0.762	0.0513	0.237
100	tr|A0A0F6CJX1|A0A0F6CJX1_MYCGL	tr|A0A0F6CJX1|A0A0F6CJX1_MYCGL	rpsE	30S ribosomal protein S5	0.901	0.907	0.0385	0.0501
101	tr|A0A0F6CJX2|A0A0F6CJX2_MYCGL	tr|A0A0F6CJX2|A0A0F6CJX2_MYCGL	rplO	50S ribosomal protein L15	0.877	0.84	0.0741	0.15
102	tr|A0A0F6CJX3|A0A0F6CJX3_MYCGL	tr|A0A0F6CJX3|A0A0F6CJX3_MYCGL	secY	Protein translocase subunit SecY	0.842	0.692	-0.0841	0.186
103	tr|A0A0F6CJX4|A0A0F6CJX4_MYCGL	tr|A0A0F6CJX4|A0A0F6CJX4_MYCGL	adk	Adenylate kinase	0.684	0.604	0.197	0.267
104	tr|A0A0F6CJX5|A0A0F6CJX5_MYCGL	tr|A0A0F6CJX5|A0A0F6CJX5_MYCGL	map	Methionine aminopeptidase	0.891	0.767	0.0722	0.297
105	tr|A0A0F6CJX8|A0A0F6CJX8_MYCGL	tr|A0A0F6CJX8|A0A0F6CJX8_MYCGL	lysS	Lysine--tRNA ligase	0.818	0.886	-0.118	-0.0723
106	tr|A0A0F6CJX9|A0A0F6CJX9_MYCGL	tr|A0A0F6CJX9|A0A0F6CJX9_MYCGL	dnaJ	Molecular chaperone DnaJ	0.685	0.849	0.441	0.276
107	tr|A0A0F6CJY0|A0A0F6CJY0_MYCGL	tr|A0A0F6CJY0|A0A0F6CJY0_MYCGL	GCW_00420	DUF2470 domain-containing protein	0.904	0.913	-0.0383	0.0376
108	tr|A0A0F6CJY1|A0A0F6CJY1_MYCGL	tr|A0A0F6CJY1|A0A0F6CJY1_MYCGL	ptsA	Phosphoenolpyruvate-protein phosphotransferase	0.896	0.858	-0.0409	-0.126
109	tr|A0A0F6CJY3|A0A0F6CJY3_MYCGL	tr|A0A0F6CJY3|A0A0F6CJY3_MYCGL	rpsO	30S ribosomal protein S15	0.901	0.76	0.0342	0.246
110	tr|A0A0F6CJY4|A0A0F6CJY4_MYCGL	tr|A0A0F6CJY4|A0A0F6CJY4_MYCGL	GCW_00450	mRNA degradation ribonucleases J1/J2	0.885	0.906	0.068	0.0486
111	tr|A0A0F6CJY5|A0A0F6CJY5_MYCGL	tr|A0A0F6CJY5|A0A0F6CJY5_MYCGL	ftsK	Cell division protein FtsK	0.904	0.797	-0.0299	0.243
112	tr|A0A0F6CJY6|A0A0F6CJY6_MYCGL	tr|A0A0F6CJY6|A0A0F6CJY6_MYCGL	trxA_1	Thioredoxin	0.826	0.901	0.167	0.0701
113	tr|A0A0F6CJY7|A0A0F6CJY7_MYCGL	tr|A0A0F6CJY7|A0A0F6CJY7_MYCGL	GCW_00465	DNA polymerase III PolC domain protein	0.902	0.852	0.0321	-0.151
114	tr|A0A0F6CJY8|A0A0F6CJY8_MYCGL	tr|A0A0F6CJY8|A0A0F6CJY8_MYCGL	uvrA	UvrABC system protein A	0.876	0.875	0.0534	0.0731
115	tr|A0A0F6CJY9|A0A0F6CJY9_MYCGL	tr|A0A0F6CJY9|A0A0F6CJY9_MYCGL	tsf	Elongation factor Ts	0.912	0.827	-0.00548	-0.155
116	tr|A0A0F6CJZ0|A0A0F6CJZ0_MYCGL	tr|A0A0F6CJZ0|A0A0F6CJZ0_MYCGL	pyrH	Uridylate kinase	0.882	0.849	0.0746	-0.156
117	tr|A0A0F6CJZ1|A0A0F6CJZ1_MYCGL	tr|A0A0F6CJZ1|A0A0F6CJZ1_MYCGL	frr	Ribosome-recycling factor	0.88	0.858	-0.0638	-0.118
118	tr|A0A0F6CJZ2|A0A0F6CJZ2_MYCGL	tr|A0A0F6CJZ2|A0A0F6CJZ2_MYCGL	cdsA	Phosphatidate cytidylyltransferase	0.887	0.849	0.149	0.353
119	tr|A0A0F6CJZ3|A0A0F6CJZ3_MYCGL	tr|A0A0F6CJZ3|A0A0F6CJZ3_MYCGL	dxr	1-deoxy-D-xylulose 5-phosphate reductoisomerase	0.706	0.896	-0.521	-0.161
120	tr|A0A0F6CJZ4|A0A0F6CJZ4_MYCGL	tr|A0A0F6CJZ4|A0A0F6CJZ4_MYCGL	GCW_00500	Protease	0.141	0.622	0.861	0.586
121	tr|A0A0F6CJZ5|A0A0F6CJZ5_MYCGL	tr|A0A0F6CJZ5|A0A0F6CJZ5_MYCGL	GCW_00510	Heavy metal transporter CzcA	0.898	0.889	0.0256	-0.0564
122	tr|A0A0F6CJZ6|A0A0F6CJZ6_MYCGL	tr|A0A0F6CJZ6|A0A0F6CJZ6_MYCGL	GCW_00520	Membrane protein	0.913	0.919	0.0103	0.018
123	tr|A0A0F6CJZ8|A0A0F6CJZ8_MYCGL	tr|A0A0F6CJZ8|A0A0F6CJZ8_MYCGL	GCW_00545	ABC transporter	0.61	0.662	0.377	0.407
124	tr|A0A0F6CJZ9|A0A0F6CJZ9_MYCGL	tr|A0A0F6CJZ9|A0A0F6CJZ9_MYCGL	GCW_00550	Multidrug ABC transporter ATP-binding protein	0.808	0.909	-0.198	0.049
125	tr|A0A0F6CK00|A0A0F6CK00_MYCGL	tr|A0A0F6CK00|A0A0F6CK00_MYCGL	GCW_00555	Aromatic cluster surface protein	0.865	0.917	-0.282	-0.0407
126	tr|A0A0F6CK01|A0A0F6CK01_MYCGL	tr|A0A0F6CK01|A0A0F6CK01_MYCGL	GCW_00565	Aromatic cluster surface protein	0.791	0.8	0.428	0.499
127	tr|A0A0F6CK04|A0A0F6CK04_MYCGL	tr|A0A0F6CK04|A0A0F6CK04_MYCGL	GCW_00585	Serine protease	0.857	0.903	-0.317	0.158
128	tr|A0A0F6CK05|A0A0F6CK05_MYCGL	tr|A0A0F6CK05|A0A0F6CK05_MYCGL	GCW_00590	Membrane protein	0.894	0.904	0.184	0.195
129	tr|A0A0F6CK06|A0A0F6CK06_MYCGL	tr|A0A0F6CK06|A0A0F6CK06_MYCGL	GCW_00595	Serine protease	0.592	0.91	-0.591	0.0721
130	tr|A0A0F6CK07|A0A0F6CK07_MYCGL	tr|A0A0F6CK07|A0A0F6CK07_MYCGL	GCW_00600	Membrane protein	0.897	0.88	0.0702	0.167
131	tr|A0A0F6CK08|A0A0F6CK08_MYCGL	tr|A0A0F6CK08|A0A0F6CK08_MYCGL	nusA	Transcription termination/antitermination protein NusA	0.876	0.918	0.0754	-0.0102
132	tr|A0A0F6CK09|A0A0F6CK09_MYCGL	tr|A0A0F6CK09|A0A0F6CK09_MYCGL	GCW_00610	DUF448 domain-containing protein	0.884	0.858	0.346	0.709
133	tr|A0A0F6CK10|A0A0F6CK10_MYCGL	tr|A0A0F6CK10|A0A0F6CK10_MYCGL	infB	Translation initiation factor IF-2	0.909	0.896	-0.0123	0.0685
134	tr|A0A0F6CK11|A0A0F6CK11_MYCGL	tr|A0A0F6CK11|A0A0F6CK11_MYCGL	rbfA	Ribosome-binding factor A	0.341	0.899	-0.285	0.0483
135	tr|A0A0F6CK12|A0A0F6CK12_MYCGL	tr|A0A0F6CK12|A0A0F6CK12_MYCGL	GCW_00640	Lipoprotein_10 domain-containing protein	0.906	0.911	0.0188	-0.0292
136	tr|A0A0F6CK13|A0A0F6CK13_MYCGL	tr|A0A0F6CK13|A0A0F6CK13_MYCGL	GCW_00650	Uncharacterized protein	0.909	0.903	-0.0631	-0.237
137	tr|A0A0F6CK14|A0A0F6CK14_MYCGL	tr|A0A0F6CK14|A0A0F6CK14_MYCGL	truB	tRNA pseudouridine synthase B	0.898	0.893	0.126	0.241
138	tr|A0A0F6CK15|A0A0F6CK15_MYCGL	tr|A0A0F6CK15|A0A0F6CK15_MYCGL	ribF	tRNA-specific 2-thiouridylase MnmA	0.911	0.888	0.0143	0.168
139	tr|A0A0F6CK16|A0A0F6CK16_MYCGL	tr|A0A0F6CK16|A0A0F6CK16_MYCGL	ach1	Acetyl-CoA hydrolase	0.321	0.63	0.385	0.317
140	tr|A0A0F6CK17|A0A0F6CK17_MYCGL	tr|A0A0F6CK17|A0A0F6CK17_MYCGL	alaS	Alanine--tRNA ligase	0.832	0.295	-0.0905	-0.296
141	tr|A0A0F6CK18|A0A0F6CK18_MYCGL	tr|A0A0F6CK18|A0A0F6CK18_MYCGL	GCW_00675	Putative pre-16S rRNA nuclease	0.806	0.777	-0.351	-0.482
142	tr|A0A0F6CK20|A0A0F6CK20_MYCGL	tr|A0A0F6CK20|A0A0F6CK20_MYCGL	GCW_00690	Peptidase U32	0.834	0.881	0.152	0.115
143	tr|A0A0F6CK21|A0A0F6CK21_MYCGL	tr|A0A0F6CK21|A0A0F6CK21_MYCGL	rpsT	30S ribosomal protein S20	0.759	0.803	0.39	0.398
144	tr|A0A0F6CK22|A0A0F6CK22_MYCGL	tr|A0A0F6CK22|A0A0F6CK22_MYCGL	GCW_00700	Putative inner membrane peptidase	0.818	0.814	0.257	0.323
145	tr|A0A0F6CK23|A0A0F6CK23_MYCGL	tr|A0A0F6CK23|A0A0F6CK23_MYCGL	fmt	Methionyl-tRNA formyltransferase	0.709	0.481	-0.153	-0.254
146	tr|A0A0F6CK24|A0A0F6CK24_MYCGL	tr|A0A0F6CK24|A0A0F6CK24_MYCGL	GCW_00710	DUF2779 domain-containing protein	0.713	0.247	-0.215	-0.451
147	tr|A0A0F6CK25|A0A0F6CK25_MYCGL	tr|A0A0F6CK25|A0A0F6CK25_MYCGL	GCW_00715	Beta-galactosidase	0.818	0.752	-0.162	-0.259
148	tr|A0A0F6CK26|A0A0F6CK26_MYCGL	tr|A0A0F6CK26|A0A0F6CK26_MYCGL	GCW_00720	Uncharacterized protein	0.913	0.91	-0.0041	0.0493
149	tr|A0A0F6CK27|A0A0F6CK27_MYCGL	tr|A0A0F6CK27|A0A0F6CK27_MYCGL	GCW_00725	Probable transcriptional regulatory protein GCW_00725	0.451	0.658	0.56	0.5
150	tr|A0A0F6CK28|A0A0F6CK28_MYCGL	tr|A0A0F6CK28|A0A0F6CK28_MYCGL	GCW_00760	Uncharacterized protein	0.751	0.872	0.509	0.296
151	tr|A0A0F6CK29|A0A0F6CK29_MYCGL	tr|A0A0F6CK29|A0A0F6CK29_MYCGL	ptsG_1	PTS sugar transporter	0.891	0.576	-0.0361	-0.221
152	tr|A0A0F6CK30|A0A0F6CK30_MYCGL	tr|A0A0F6CK30|A0A0F6CK30_MYCGL	putA	Glyceraldehyde-3-phosphate dehydrogenase	0.85	0.904	-0.0874	-0.039
153	tr|A0A0F6CK31|A0A0F6CK31_MYCGL	tr|A0A0F6CK31|A0A0F6CK31_MYCGL	rpmE	50S ribosomal protein L31	0.869	0.798	-0.138	0.308
154	tr|A0A0F6CK32|A0A0F6CK32_MYCGL	tr|A0A0F6CK32|A0A0F6CK32_MYCGL	prfA	Peptide chain release factor 1	0.568	0.501	0.309	0.391
155	tr|A0A0F6CK33|A0A0F6CK33_MYCGL	tr|A0A0F6CK33|A0A0F6CK33_MYCGL	hemK	Modification methylase HemK	0.82	0.862	-0.167	0.149
156	tr|A0A0F6CK34|A0A0F6CK34_MYCGL	tr|A0A0F6CK34|A0A0F6CK34_MYCGL	GCW_00790	Translation factor/ribosome maturation factor	0.808	0.787	-0.191	0.255
157	tr|A0A0F6CK35|A0A0F6CK35_MYCGL	tr|A0A0F6CK35|A0A0F6CK35_MYCGL	rpiB	Ribose 5-phosphate isomerase	0.817	0.658	-0.185	-0.363
158	tr|A0A0F6CK37|A0A0F6CK37_MYCGL	tr|A0A0F6CK37|A0A0F6CK37_MYCGL	hup_1	Histone-like DNA-binding superfamily protein	0.639	0.421	0.251	0.384
159	tr|A0A0F6CK38|A0A0F6CK38_MYCGL	tr|A0A0F6CK38|A0A0F6CK38_MYCGL	GCW_00815	Uncharacterized protein	0.898	0.896	0.047	-0.081
160	tr|A0A0F6CK40|A0A0F6CK40_MYCGL	tr|A0A0F6CK40|A0A0F6CK40_MYCGL	rplJ	50S ribosomal protein L10	0.25	0.453	0.529	0.504
161	tr|A0A0F6CK41|A0A0F6CK41_MYCGL	tr|A0A0F6CK41|A0A0F6CK41_MYCGL	rplL	50S ribosomal protein L7/L12	0.866	0.868	0.109	0.138
162	tr|A0A0F6CK42|A0A0F6CK42_MYCGL	tr|A0A0F6CK42|A0A0F6CK42_MYCGL	rpmF	50S ribosomal protein L32	0.708	0.812	0.484	0.41
163	tr|A0A0F6CK43|A0A0F6CK43_MYCGL	tr|A0A0F6CK43|A0A0F6CK43_MYCGL	GCW_00840	Uncharacterized protein	0.864	0.844	0.236	0.373
164	tr|A0A0F6CK44|A0A0F6CK44_MYCGL	tr|A0A0F6CK44|A0A0F6CK44_MYCGL	dnaJ_2	Chaperone protein DnaJ	0.909	0.864	0.012	-0.11
165	tr|A0A0F6CK45|A0A0F6CK45_MYCGL	tr|A0A0F6CK45|A0A0F6CK45_MYCGL	GCW_00850	Uncharacterized protein	0.911	0.88	0.00536	-0.0757
166	tr|A0A0F6CK46|A0A0F6CK46_MYCGL	tr|A0A0F6CK46|A0A0F6CK46_MYCGL	GCW_00855	Multidrug and toxic compound extrusion family protein	0.867	0.903	-0.12	0.0697
167	tr|A0A0F6CK49|A0A0F6CK49_MYCGL	tr|A0A0F6CK49|A0A0F6CK49_MYCGL	GCW_00875	Uncharacterized protein	0.367	0.897	0.299	0.0568
168	tr|A0A0F6CK50|A0A0F6CK50_MYCGL	tr|A0A0F6CK50|A0A0F6CK50_MYCGL	metG_2	Methionine--tRNA ligase	0.693	0.743	-0.226	-0.237
169	tr|A0A0F6CK51|A0A0F6CK51_MYCGL	tr|A0A0F6CK51|A0A0F6CK51_MYCGL	der	GTPase Der	0.894	0.87	-0.0333	0.0798
170	tr|A0A0F6CK52|A0A0F6CK52_MYCGL	tr|A0A0F6CK52|A0A0F6CK52_MYCGL	cmk	Cytidylate kinase	0.821	0.858	-0.121	-0.113
171	tr|A0A0F6CK53|A0A0F6CK53_MYCGL	tr|A0A0F6CK53|A0A0F6CK53_MYCGL	GCW_00900	Uncharacterized protein	0.784	0.898	-0.172	-0.0636
172	tr|A0A0F6CK54|A0A0F6CK54_MYCGL	tr|A0A0F6CK54|A0A0F6CK54_MYCGL	GCW_00905	Glutamine amidotransferase	0.901	0.858	-0.0414	-0.174
173	tr|A0A0F6CK56|A0A0F6CK56_MYCGL	tr|A0A0F6CK56|A0A0F6CK56_MYCGL	GCW_00965	Membrane protein	0.868	0.912	-0.247	-0.0801
174	tr|A0A0F6CK57|A0A0F6CK57_MYCGL	tr|A0A0F6CK57|A0A0F6CK57_MYCGL	GCW_00975	Membrane protein	0.911	0.812	-0.0112	-0.273
175	tr|A0A0F6CK58|A0A0F6CK58_MYCGL	tr|A0A0F6CK58|A0A0F6CK58_MYCGL	GCW_00980	Uncharacterized protein	0.909	0.777	0.0157	0.255
176	tr|A0A0F6CK59|A0A0F6CK59_MYCGL	tr|A0A0F6CK59|A0A0F6CK59_MYCGL	miaA	tRNA dimethylallyltransferase	0.865	0.894	0.173	0.133
177	tr|A0A0F6CK60|A0A0F6CK60_MYCGL	tr|A0A0F6CK60|A0A0F6CK60_MYCGL	ftsY	Signal recognition particle receptor FtsY	0.558	0.405	-0.198	-0.273
178	tr|A0A0F6CK61|A0A0F6CK61_MYCGL	tr|A0A0F6CK61|A0A0F6CK61_MYCGL	ylxM	UPF0122 protein GCW_01005	0.909	0.898	0.0287	-0.138
179	tr|A0A0F6CK62|A0A0F6CK62_MYCGL	tr|A0A0F6CK62|A0A0F6CK62_MYCGL	GCW_01010	Trigger-factor-like protein, SurA N-terminal domain	0.824	0.828	-0.147	-0.177
180	tr|A0A0F6CK63|A0A0F6CK63_MYCGL	tr|A0A0F6CK63|A0A0F6CK63_MYCGL	GCW_01015	Uncharacterized protein	0.896	0.912	-0.115	0.0786
181	tr|A0A0F6CK64|A0A0F6CK64_MYCGL	tr|A0A0F6CK64|A0A0F6CK64_MYCGL	thrS	Threonine--tRNA ligase	0.608	0.717	-0.279	-0.268
182	tr|A0A0F6CK65|A0A0F6CK65_MYCGL	tr|A0A0F6CK65|A0A0F6CK65_MYCGL	GCW_01025	Uncharacterized protein	0.882	0.875	-0.219	0.338
183	tr|A0A0F6CK66|A0A0F6CK66_MYCGL	tr|A0A0F6CK66|A0A0F6CK66_MYCGL	hlp3	Cytadherence high molecular weight protein 3	0.903	0.888	0.0217	-0.0678
184	tr|A0A0F6CK67|A0A0F6CK67_MYCGL	tr|A0A0F6CK67|A0A0F6CK67_MYCGL	licA	Choline kinase	0.898	0.727	-0.0352	-0.223
185	tr|A0A0F6CK68|A0A0F6CK68_MYCGL	tr|A0A0F6CK68|A0A0F6CK68_MYCGL	mgc2	p32 adhesin	0.447	0.889	0.35	-0.0893
186	tr|A0A0F6CK69|A0A0F6CK69_MYCGL	tr|A0A0F6CK69|A0A0F6CK69_MYCGL	gapA	Adhesin	0.733	0.777	-0.165	-0.172
187	tr|A0A0F6CK70|A0A0F6CK70_MYCGL	tr|A0A0F6CK70|A0A0F6CK70_MYCGL	crmA	Cytadherence protein A	0.854	0.836	-0.0992	-0.148
188	tr|A0A0F6CK71|A0A0F6CK71_MYCGL	tr|A0A0F6CK71|A0A0F6CK71_MYCGL	crmB	Cytadherence protein B	0.573	0.529	0.546	0.675
189	tr|A0A0F6CK72|A0A0F6CK72_MYCGL	tr|A0A0F6CK72|A0A0F6CK72_MYCGL	crmC	Cytadherence protein C	0.849	0.881	0.33	0.283
190	tr|A0A0F6CK73|A0A0F6CK73_MYCGL	tr|A0A0F6CK73|A0A0F6CK73_MYCGL	hisS	Histidine--tRNA ligase	0.806	0.902	-0.262	-0.0941
191	tr|A0A0F6CK74|A0A0F6CK74_MYCGL	tr|A0A0F6CK74|A0A0F6CK74_MYCGL	aspS	Aspartate--tRNA ligase	0.873	0.737	-0.0717	-0.209
192	tr|A0A0F6CK75|A0A0F6CK75_MYCGL	tr|A0A0F6CK75|A0A0F6CK75_MYCGL	spoT	Guanosine polyphosphate pyrophosphohydrolase	0.873	0.907	0.0899	0.0452
193	tr|A0A0F6CK76|A0A0F6CK76_MYCGL	tr|A0A0F6CK76|A0A0F6CK76_MYCGL	pyrG	CTP synthase	0.73	0.686	-0.272	-0.359
194	tr|A0A0F6CK77|A0A0F6CK77_MYCGL	tr|A0A0F6CK77|A0A0F6CK77_MYCGL	GCW_01085	Uncharacterized protein	0.9	0.893	-0.0459	-0.0981
195	tr|A0A0F6CK78|A0A0F6CK78_MYCGL	tr|A0A0F6CK78|A0A0F6CK78_MYCGL	apt	Adenine phosphoribosyltransferase	0.896	0.893	-0.0331	-0.0569
196	tr|A0A0F6CK80|A0A0F6CK80_MYCGL	tr|A0A0F6CK80|A0A0F6CK80_MYCGL	GCW_01100	Uncharacterized protein	0.845	0.89	-0.152	-0.105
197	tr|A0A0F6CK81|A0A0F6CK81_MYCGL	tr|A0A0F6CK81|A0A0F6CK81_MYCGL	greA	Transcription elongation factor GreA	0.912	0.904	0.00873	-0.105
198	tr|A0A0F6CK82|A0A0F6CK82_MYCGL	tr|A0A0F6CK82|A0A0F6CK82_MYCGL	potE	Amino acid permease	0.913	0.831	0.00615	-0.472
199	tr|A0A0F6CK84|A0A0F6CK84_MYCGL	tr|A0A0F6CK84|A0A0F6CK84_MYCGL	GCW_01145	VlhA.3.03 variable lipoprotein family protein	0.871	0.495	0.0812	-0.336
200	tr|A0A0F6CK86|A0A0F6CK86_MYCGL	tr|A0A0F6CK86|A0A0F6CK86_MYCGL	GCW_01155	VlhA.1.01 variable lipoprotein family protein	0.902	0.895	0.0505	-0.119
201	tr|A0A0F6CK91|A0A0F6CK91_MYCGL	tr|A0A0F6CK91|A0A0F6CK91_MYCGL	dut	Deoxyuridine 5-triphosphate nucleotidohydrolase	0.897	0.728	0.139	0.841
202	tr|A0A0F6CK92|A0A0F6CK92_MYCGL	tr|A0A0F6CK92|A0A0F6CK92_MYCGL	GCW_01215	Protease	0.658	0.698	-0.377	-0.413
203	tr|A0A0F6CK93|A0A0F6CK93_MYCGL	tr|A0A0F6CK93|A0A0F6CK93_MYCGL	rluA_1	Pseudouridine synthase	0.903	0.92	0.0293	0.00328
204	tr|A0A0F6CK94|A0A0F6CK94_MYCGL	tr|A0A0F6CK94|A0A0F6CK94_MYCGL	lspA	Lipoprotein signal peptidase	0.903	0.88	0.0315	0.114
205	tr|A0A0F6CK95|A0A0F6CK95_MYCGL	tr|A0A0F6CK95|A0A0F6CK95_MYCGL	GCW_01230	Glutamine amidotransferase	0.425	0.767	0.342	0.23
206	tr|A0A0F6CK96|A0A0F6CK96_MYCGL	tr|A0A0F6CK96|A0A0F6CK96_MYCGL	GCW_01235	Esterase	0.843	0.828	0.148	0.207
207	tr|A0A0F6CK97|A0A0F6CK97_MYCGL	tr|A0A0F6CK97|A0A0F6CK97_MYCGL	rpoB	DNA-directed RNA polymerase subunit beta	0.711	0.865	0.143	0.0808
208	tr|A0A0F6CK98|A0A0F6CK98_MYCGL	tr|A0A0F6CK98|A0A0F6CK98_MYCGL	rpoC	DNA-directed RNA polymerase subunit beta	0.88	0.896	0.0565	0.054
209	tr|A0A0F6CKA0|A0A0F6CKA0_MYCGL	tr|A0A0F6CKA0|A0A0F6CKA0_MYCGL	GCW_01255	Uncharacterized protein	0.903	0.904	-0.0943	0.17
210	tr|A0A0F6CKA1|A0A0F6CKA1_MYCGL	tr|A0A0F6CKA1|A0A0F6CKA1_MYCGL	GCW_01260	Uncharacterized protein	0.874	0.893	-0.1	-0.091
211	tr|A0A0F6CKA2|A0A0F6CKA2_MYCGL	tr|A0A0F6CKA2|A0A0F6CKA2_MYCGL	hatA	High affinity transport system protein	0.808	0.921	-0.416	0.000367
212	tr|A0A0F6CKA3|A0A0F6CKA3_MYCGL	tr|A0A0F6CKA3|A0A0F6CKA3_MYCGL	hatB	High affinity ABC transporter ATPase HatB	0.913	0.797	-0.00318	0.538
213	tr|A0A0F6CKA4|A0A0F6CKA4_MYCGL	tr|A0A0F6CKA4|A0A0F6CKA4_MYCGL	proS	Proline--tRNA ligase	0.839	0.895	0.16	-0.0909
214	tr|A0A0F6CKA8|A0A0F6CKA8_MYCGL	tr|A0A0F6CKA8|A0A0F6CKA8_MYCGL	acpP	Acyl carrier protein	0.173	0.422	0.402	0.364
215	tr|A0A0F6CKA9|A0A0F6CKA9_MYCGL	tr|A0A0F6CKA9|A0A0F6CKA9_MYCGL	tuf	Elongation factor Tu	0.87	0.92	0.0578	-0.00217
216	tr|A0A0F6CKB0|A0A0F6CKB0_MYCGL	tr|A0A0F6CKB0|A0A0F6CKB0_MYCGL	GCW_01325	Phenylalanine--tRNA ligase beta subunit	0.913	0.897	-0.0077	-0.223
217	tr|A0A0F6CKB1|A0A0F6CKB1_MYCGL	tr|A0A0F6CKB1|A0A0F6CKB1_MYCGL	GCW_01330	Uncharacterized protein	0.781	0.194	0.346	0.971
218	tr|A0A0F6CKB2|A0A0F6CKB2_MYCGL	tr|A0A0F6CKB2|A0A0F6CKB2_MYCGL	GCW_01350	Membrane protein	0.171	0.843	-0.655	0.235
219	tr|A0A0F6CKB3|A0A0F6CKB3_MYCGL	tr|A0A0F6CKB3|A0A0F6CKB3_MYCGL	GCW_01355	Uncharacterized protein	0.869	0.876	0.2	-0.241
220	tr|A0A0F6CKB4|A0A0F6CKB4_MYCGL	tr|A0A0F6CKB4|A0A0F6CKB4_MYCGL	dnaE	DNA-directed DNA polymerase	0.8	0.846	-0.169	-0.157
221	tr|A0A0F6CKB5|A0A0F6CKB5_MYCGL	tr|A0A0F6CKB5|A0A0F6CKB5_MYCGL	exo	5-3 exonuclease	0.82	0.724	-0.313	-0.544
222	tr|A0A0F6CKB6|A0A0F6CKB6_MYCGL	tr|A0A0F6CKB6|A0A0F6CKB6_MYCGL	mutM	Formamidopyrimidine-DNA glycosylase	0.906	0.892	-0.0418	0.157
223	tr|A0A0F6CKB7|A0A0F6CKB7_MYCGL	tr|A0A0F6CKB7|A0A0F6CKB7_MYCGL	coaE	Dephospho-CoA kinase	0.865	0.893	-0.171	-0.135
224	tr|A0A0F6CKB8|A0A0F6CKB8_MYCGL	tr|A0A0F6CKB8|A0A0F6CKB8_MYCGL	dnaB	Replication initiation/membrane attachmentprotein DnaB	0.613	0.791	-0.739	-0.574
225	tr|A0A0F6CKB9|A0A0F6CKB9_MYCGL	tr|A0A0F6CKB9|A0A0F6CKB9_MYCGL	GCW_01385	Uncharacterized protein	0.91	0.624	0.0108	0.33
226	tr|A0A0F6CKC1|A0A0F6CKC1_MYCGL	tr|A0A0F6CKC1|A0A0F6CKC1_MYCGL	asnC	Asparagine--tRNA ligase	0.912	0.823	-0.00429	0.121
227	tr|A0A0F6CKC2|A0A0F6CKC2_MYCGL	tr|A0A0F6CKC2|A0A0F6CKC2_MYCGL	pgsA	CDP-diacylglycerol-glycerol-3-phosphate3-phosphatidyltransferase	0.834	0.867	0.194	0.181
228	tr|A0A0F6CKC3|A0A0F6CKC3_MYCGL	tr|A0A0F6CKC3|A0A0F6CKC3_MYCGL	GCW_01405	Uncharacterized protein	0.897	0.912	0.105	0.0706
229	tr|A0A0F6CKC4|A0A0F6CKC4_MYCGL	tr|A0A0F6CKC4|A0A0F6CKC4_MYCGL	ispD	2-C-methyl-D-erythritol 4-phosphatecytidylyltransferase	0.893	0.878	0.134	0.277
230	tr|A0A0F6CKC5|A0A0F6CKC5_MYCGL	tr|A0A0F6CKC5|A0A0F6CKC5_MYCGL	GCW_01415	Uncharacterized protein	0.62	0.778	0.228	0.188
231	tr|A0A0F6CKC6|A0A0F6CKC6_MYCGL	tr|A0A0F6CKC6|A0A0F6CKC6_MYCGL	GCW_01420	IgG-blocking protein M	0.592	0.633	0.431	0.476
232	tr|A0A0F6CKC7|A0A0F6CKC7_MYCGL	tr|A0A0F6CKC7|A0A0F6CKC7_MYCGL	GCW_01430	Sugar ABC transporter ATP-binding protein	0.573	0.744	-0.419	-0.358
233	tr|A0A0F6CKC9|A0A0F6CKC9_MYCGL	tr|A0A0F6CKC9|A0A0F6CKC9_MYCGL	GCW_01440	Sugar ABC transporter permease	0.911	0.91	-0.0324	0.143
234	tr|A0A0F6CKD0|A0A0F6CKD0_MYCGL	tr|A0A0F6CKD0|A0A0F6CKD0_MYCGL	GCW_01450	Uncharacterized protein	0.575	0.781	0.228	0.174
235	tr|A0A0F6CKD2|A0A0F6CKD2_MYCGL	tr|A0A0F6CKD2|A0A0F6CKD2_MYCGL	GCW_01490	ABC transporter permease, FtsX superfamily	0.744	0.896	0.316	0.109
236	tr|A0A0F6CKD5|A0A0F6CKD5_MYCGL	tr|A0A0F6CKD5|A0A0F6CKD5_MYCGL	GCW_01520	M42 glutamyl-aminopeptidase family protein	0.852	0.839	-0.146	-0.206
237	tr|A0A0F6CKD6|A0A0F6CKD6_MYCGL	tr|A0A0F6CKD6|A0A0F6CKD6_MYCGL	GCW_01525	Bifunctional protein: major facilitator superfamily transporter and SAM-dependent methyltransferase	0.79	0.697	0.294	0.466
238	tr|A0A0F6CKD8|A0A0F6CKD8_MYCGL	tr|A0A0F6CKD8|A0A0F6CKD8_MYCGL	GCW_01535	Flavodoxin	0.848	0.896	0.163	0.0974
239	tr|A0A0F6CKD9|A0A0F6CKD9_MYCGL	tr|A0A0F6CKD9|A0A0F6CKD9_MYCGL	GCW_01540	Uncharacterized protein	0.779	0.779	-0.375	-0.454
240	tr|A0A0F6CKE0|A0A0F6CKE0_MYCGL	tr|A0A0F6CKE0|A0A0F6CKE0_MYCGL	GCW_01545	Uncharacterized protein	0.819	0.885	-0.172	-0.108
241	tr|A0A0F6CKE1|A0A0F6CKE1_MYCGL	tr|A0A0F6CKE1|A0A0F6CKE1_MYCGL	GCW_01550	Uncharacterized protein	0.886	0.884	-0.0901	-0.133
242	tr|A0A0F6CKE2|A0A0F6CKE2_MYCGL	tr|A0A0F6CKE2|A0A0F6CKE2_MYCGL	GCW_01555	HAD family hydrolase	0.893	0.814	-0.0381	-0.141
243	tr|A0A0F6CKE5|A0A0F6CKE5_MYCGL	tr|A0A0F6CKE5|A0A0F6CKE5_MYCGL	ppa	Inorganic pyrophosphatase	0.91	0.652	-0.0106	-0.329
244	tr|A0A0F6CKE6|A0A0F6CKE6_MYCGL	tr|A0A0F6CKE6|A0A0F6CKE6_MYCGL	GCW_01580	Metal-dependent hydrolase	0.801	0.867	0.468	0.352
245	tr|A0A0F6CKE7|A0A0F6CKE7_MYCGL	tr|A0A0F6CKE7|A0A0F6CKE7_MYCGL	sufC	ABC transporter ATP-binding protein	0.892	0.912	-0.0371	0.0194
246	tr|A0A0F6CKE8|A0A0F6CKE8_MYCGL	tr|A0A0F6CKE8|A0A0F6CKE8_MYCGL	sufB	ABC transporter ATP-binding protein	0.852	0.835	0.219	0.32
247	tr|A0A0F6CKE9|A0A0F6CKE9_MYCGL	tr|A0A0F6CKE9|A0A0F6CKE9_MYCGL	csdB	Cysteine desulfurase	0.911	0.914	0.01	-0.0315
248	tr|A0A0F6CKF0|A0A0F6CKF0_MYCGL	tr|A0A0F6CKF0|A0A0F6CKF0_MYCGL	GCW_01600	Nitrogen fixation protein NifU	0.165	0.239	-0.74	-0.79
249	tr|A0A0F6CKF1|A0A0F6CKF1_MYCGL	tr|A0A0F6CKF1|A0A0F6CKF1_MYCGL	sufB	Fe-S cluster assembly protein SufB	0.7	0.584	0.143	0.206
250	tr|A0A0F6CKF2|A0A0F6CKF2_MYCGL	tr|A0A0F6CKF2|A0A0F6CKF2_MYCGL	dnaJ_4	Molecular chaperone DnaJ	0.138	0.773	0.511	0.248
251	tr|A0A0F6CKF3|A0A0F6CKF3_MYCGL	tr|A0A0F6CKF3|A0A0F6CKF3_MYCGL	gpsA	Glycerol-3-phosphate dehydrogenase	0.838	0.886	-0.155	-0.109
252	tr|A0A0F6CKF4|A0A0F6CKF4_MYCGL	tr|A0A0F6CKF4|A0A0F6CKF4_MYCGL	dnaJ_5	Molecular chaperone DnaJ	0.645	0.622	0.372	0.455
253	tr|A0A0F6CKF5|A0A0F6CKF5_MYCGL	tr|A0A0F6CKF5|A0A0F6CKF5_MYCGL	GCW_01625	Multidrug ABC transporter ATP-binding protein	0.862	0.92	-0.0869	0.00274
254	tr|A0A0F6CKF6|A0A0F6CKF6_MYCGL	tr|A0A0F6CKF6|A0A0F6CKF6_MYCGL	GCW_01630	Multidrug ABC transporter permease	0.766	0.815	-0.195	-0.192
255	tr|A0A0F6CKF7|A0A0F6CKF7_MYCGL	tr|A0A0F6CKF7|A0A0F6CKF7_MYCGL	osmC	Organic hydroperoxide resistance protein	0.87	0.92	-0.106	-0.00243
256	tr|A0A0F6CKF8|A0A0F6CKF8_MYCGL	tr|A0A0F6CKF8|A0A0F6CKF8_MYCGL	ffh	Signal recognition particle protein	0.898	0.9	-0.0361	0.0535
257	tr|A0A0F6CKF9|A0A0F6CKF9_MYCGL	tr|A0A0F6CKF9|A0A0F6CKF9_MYCGL	tyrS	Tyrosine--tRNA ligase	0.895	0.918	0.0675	-0.0134
258	tr|A0A0F6CKG0|A0A0F6CKG0_MYCGL	tr|A0A0F6CKG0|A0A0F6CKG0_MYCGL	glyA	Serine hydroxymethyltransferase	0.81	0.738	0.124	0.197
259	tr|A0A0F6CKG2|A0A0F6CKG2_MYCGL	tr|A0A0F6CKG2|A0A0F6CKG2_MYCGL	cysP	Peptidase C1, IgG cleavage protease	0.462	0.56	0.454	0.474
260	tr|A0A0F6CKG3|A0A0F6CKG3_MYCGL	tr|A0A0F6CKG3|A0A0F6CKG3_MYCGL	rplM	50S ribosomal protein L13	0.786	0.842	0.181	0.163
261	tr|A0A0F6CKG4|A0A0F6CKG4_MYCGL	tr|A0A0F6CKG4|A0A0F6CKG4_MYCGL	rpsI	30S ribosomal protein S9	0.155	0.195	0.497	0.558
262	tr|A0A0F6CKG5|A0A0F6CKG5_MYCGL	tr|A0A0F6CKG5|A0A0F6CKG5_MYCGL	ispG	4-hydroxy-3-methylbut-2-en-1-yl diphosphate synthase (flavodoxin)	0.789	0.904	-0.232	-0.0668
263	tr|A0A0F6CKG6|A0A0F6CKG6_MYCGL	tr|A0A0F6CKG6|A0A0F6CKG6_MYCGL	upp	Uracil phosphoribosyltransferase	0.176	0.219	0.378	0.424
264	tr|A0A0F6CKG7|A0A0F6CKG7_MYCGL	tr|A0A0F6CKG7|A0A0F6CKG7_MYCGL	GCW_01705	DUF31 domain-containing protein	0.674	0.87	0.188	0.0924
265	tr|A0A0F6CKG8|A0A0F6CKG8_MYCGL	tr|A0A0F6CKG8|A0A0F6CKG8_MYCGL	atpI	ATP synthase subunit I	0.906	0.916	-0.117	-0.0979
266	tr|A0A0F6CKH1|A0A0F6CKH1_MYCGL	tr|A0A0F6CKH1|A0A0F6CKH1_MYCGL	atpF	ATP synthase subunit b	0.754	0.719	-0.267	-0.35
267	tr|A0A0F6CKH2|A0A0F6CKH2_MYCGL	tr|A0A0F6CKH2|A0A0F6CKH2_MYCGL	atpH	ATP synthase subunit delta	0.845	0.805	-0.239	-0.386
268	tr|A0A0F6CKH3|A0A0F6CKH3_MYCGL	tr|A0A0F6CKH3|A0A0F6CKH3_MYCGL	atpA	ATP synthase subunit alpha	0.832	0.915	-0.135	0.0203
269	tr|A0A0F6CKH4|A0A0F6CKH4_MYCGL	tr|A0A0F6CKH4|A0A0F6CKH4_MYCGL	atpG	ATP synthase gamma chain	0.911	0.904	0.0166	0.103
270	tr|A0A0F6CKH5|A0A0F6CKH5_MYCGL	tr|A0A0F6CKH5|A0A0F6CKH5_MYCGL	atpD_1	ATP synthase subunit beta	0.435	0.137	-0.263	-0.427
271	tr|A0A0F6CKH6|A0A0F6CKH6_MYCGL	tr|A0A0F6CKH6|A0A0F6CKH6_MYCGL	atpC	ATP synthase epsilon chain	0.811	0.794	0.173	0.23
272	tr|A0A0F6CKH7|A0A0F6CKH7_MYCGL	tr|A0A0F6CKH7|A0A0F6CKH7_MYCGL	GCW_01755	Uncharacterized protein	0.914	0.698	-0.000372	0.421
273	tr|A0A0F6CKH8|A0A0F6CKH8_MYCGL	tr|A0A0F6CKH8|A0A0F6CKH8_MYCGL	GCW_01775	Dehydratase	0.866	0.84	-0.101	0.171
274	tr|A0A0F6CKH9|A0A0F6CKH9_MYCGL	tr|A0A0F6CKH9|A0A0F6CKH9_MYCGL	gapd	Glyceraldehyde-3-phosphate dehydrogenase	0.859	0.879	-0.0766	-0.0761
275	tr|A0A0F6CKI0|A0A0F6CKI0_MYCGL	tr|A0A0F6CKI0|A0A0F6CKI0_MYCGL	pgk	Phosphoglycerate kinase	0.881	0.89	0.0731	0.0838
276	tr|A0A0F6CKI2|A0A0F6CKI2_MYCGL	tr|A0A0F6CKI2|A0A0F6CKI2_MYCGL	GCW_01795	Uncharacterized protein	0.858	0.828	0.109	0.177
277	tr|A0A0F6CKI3|A0A0F6CKI3_MYCGL	tr|A0A0F6CKI3|A0A0F6CKI3_MYCGL	rpsU	30S ribosomal protein S21	0.909	0.835	0.0207	-0.254
278	tr|A0A0F6CKI4|A0A0F6CKI4_MYCGL	tr|A0A0F6CKI4|A0A0F6CKI4_MYCGL	GCW_01810	Uncharacterized protein	0.789	0.804	-0.142	-0.161
279	tr|A0A0F6CKI5|A0A0F6CKI5_MYCGL	tr|A0A0F6CKI5|A0A0F6CKI5_MYCGL	trmB	tRNA (guanine-N(7)-)-methyltransferase	0.617	0.889	-0.557	-0.177
280	tr|A0A0F6CKI6|A0A0F6CKI6_MYCGL	tr|A0A0F6CKI6|A0A0F6CKI6_MYCGL	cspR	Putative tRNA (cytidine(34)-2-O)-methyltransferase	0.882	0.876	-0.103	0.157
281	tr|A0A0F6CKI7|A0A0F6CKI7_MYCGL	tr|A0A0F6CKI7|A0A0F6CKI7_MYCGL	ileS	Isoleucine--tRNA ligase	0.776	0.861	0.144	0.105
282	tr|A0A0F6CKI8|A0A0F6CKI8_MYCGL	tr|A0A0F6CKI8|A0A0F6CKI8_MYCGL	fldA	Flavodoxin	0.903	0.864	-0.0737	-0.337
283	tr|A0A0F6CKI9|A0A0F6CKI9_MYCGL	tr|A0A0F6CKI9|A0A0F6CKI9_MYCGL	plpA	Fibronectin-binding protein	0.765	0.891	0.164	0.0688
284	tr|A0A0F6CKJ0|A0A0F6CKJ0_MYCGL	tr|A0A0F6CKJ0|A0A0F6CKJ0_MYCGL	hlp2	Cytadherence high molecular weight protein 2	0.6	0.699	0.177	0.176
285	tr|A0A0F6CKJ1|A0A0F6CKJ1_MYCGL	tr|A0A0F6CKJ1|A0A0F6CKJ1_MYCGL	GCW_01845	Cytadherence-associated protein	0.862	0.92	0.0654	0.00098
286	tr|A0A0F6CKJ2|A0A0F6CKJ2_MYCGL	tr|A0A0F6CKJ2|A0A0F6CKJ2_MYCGL	GCW_01850	Uncharacterized protein	0.82	0.914	0.228	-0.0348
287	tr|A0A0F6CKJ5|A0A0F6CKJ5_MYCGL	tr|A0A0F6CKJ5|A0A0F6CKJ5_MYCGL	GCW_01870	Uncharacterized protein	0.84	0.754	0.137	0.255
288	tr|A0A0F6CKJ6|A0A0F6CKJ6_MYCGL	tr|A0A0F6CKJ6|A0A0F6CKJ6_MYCGL	arcA_1	Arginine deiminase	0.594	0.853	0.2	0.104
289	tr|A0A0F6CKJ7|A0A0F6CKJ7_MYCGL	tr|A0A0F6CKJ7|A0A0F6CKJ7_MYCGL	trxB_1	Ferredoxin--NADP reductase	0.712	0.437	0.229	0.401
290	tr|A0A0F6CKJ8|A0A0F6CKJ8_MYCGL	tr|A0A0F6CKJ8|A0A0F6CKJ8_MYCGL	GCW_01885	Chromosome segregation ATPase Smc	0.366	0.402	0.288	0.322
291	tr|A0A0F6CKJ9|A0A0F6CKJ9_MYCGL	tr|A0A0F6CKJ9|A0A0F6CKJ9_MYCGL	GCW_01890	ATP synthase B/B CF(0)	0.288	0.65	-0.299	-0.23
292	tr|A0A0F6CKK0|A0A0F6CKK0_MYCGL	tr|A0A0F6CKK0|A0A0F6CKK0_MYCGL	GCW_01895	Esterase	0.904	0.914	0.0479	-0.0432
293	tr|A0A0F6CKK1|A0A0F6CKK1_MYCGL	tr|A0A0F6CKK1|A0A0F6CKK1_MYCGL	dnaJ_6	Molecular chaperone DnaJ	0.896	0.86	0.0306	-0.0923
294	tr|A0A0F6CKK2|A0A0F6CKK2_MYCGL	tr|A0A0F6CKK2|A0A0F6CKK2_MYCGL	grpE	Protein GrpE	0.913	0.896	-0.0058	-0.133
295	tr|A0A0F6CKK4|A0A0F6CKK4_MYCGL	tr|A0A0F6CKK4|A0A0F6CKK4_MYCGL	GCW_01920	VlhA.5.02 variable lipoprotein family protein	0.651	0.161	0.249	0.518
296	tr|A0A0F6CKK8|A0A0F6CKK8_MYCGL	tr|A0A0F6CKK8|A0A0F6CKK8_MYCGL	GCW_01970	VlhA.5.02 variable lipoprotein family protein	0.888	0.794	0.189	0.656
297	tr|A0A0F6CKL4|A0A0F6CKL4_MYCGL	tr|A0A0F6CKL4|A0A0F6CKL4_MYCGL	GCW_02000	1-deoxy-D-xylulose-5-phosphate synthase	0.788	0.883	0.231	-0.128
298	tr|A0A0F6CKL5|A0A0F6CKL5_MYCGL	tr|A0A0F6CKL5|A0A0F6CKL5_MYCGL	hrcA	Heat-inducible transcription repressor HrcA	0.804	0.785	-0.158	-0.209
299	tr|A0A0F6CKL6|A0A0F6CKL6_MYCGL	tr|A0A0F6CKL6|A0A0F6CKL6_MYCGL	uvrC	UvrABC system protein C	0.902	0.903	-0.0394	-0.0679
300	tr|A0A0F6CKL8|A0A0F6CKL8_MYCGL	tr|A0A0F6CKL8|A0A0F6CKL8_MYCGL	infC	Translation initiation factor IF-3	0.904	0.852	0.0294	-0.166
301	tr|A0A0F6CKL9|A0A0F6CKL9_MYCGL	tr|A0A0F6CKL9|A0A0F6CKL9_MYCGL	rpmI	50S ribosomal protein L35	0.323	0.413	1.21	1.29
302	tr|A0A0F6CKM0|A0A0F6CKM0_MYCGL	tr|A0A0F6CKM0|A0A0F6CKM0_MYCGL	rplT	50S ribosomal protein L20	0.81	0.347	0.193	0.523
303	tr|A0A0F6CKM1|A0A0F6CKM1_MYCGL	tr|A0A0F6CKM1|A0A0F6CKM1_MYCGL	GCW_02035	dUTPase	0.878	0.845	0.106	0.211
304	tr|A0A0F6CKM2|A0A0F6CKM2_MYCGL	tr|A0A0F6CKM2|A0A0F6CKM2_MYCGL	GCW_02060	ABC transporter ATP-binding protein	0.841	0.845	-0.48	-0.583
305	tr|A0A0F6CKM3|A0A0F6CKM3_MYCGL	tr|A0A0F6CKM3|A0A0F6CKM3_MYCGL	GCW_02065	Multidrug ABC transporter permease	0.821	0.842	0.574	0.615
306	tr|A0A0F6CKM4|A0A0F6CKM4_MYCGL	tr|A0A0F6CKM4|A0A0F6CKM4_MYCGL	rplU	50S ribosomal protein L21	0.695	0.557	0.311	0.457
307	tr|A0A0F6CKM5|A0A0F6CKM5_MYCGL	tr|A0A0F6CKM5|A0A0F6CKM5_MYCGL	GCW_02075	Uncharacterized protein	0.868	0.918	-0.404	-0.0388
308	tr|A0A0F6CKM6|A0A0F6CKM6_MYCGL	tr|A0A0F6CKM6|A0A0F6CKM6_MYCGL	rpmA	50S ribosomal protein L27	0.859	0.581	0.156	0.491
309	tr|A0A0F6CKM7|A0A0F6CKM7_MYCGL	tr|A0A0F6CKM7|A0A0F6CKM7_MYCGL	nfo	Probable endonuclease 4	0.807	0.908	-0.187	-0.0488
310	tr|A0A0F6CKM8|A0A0F6CKM8_MYCGL	tr|A0A0F6CKM8|A0A0F6CKM8_MYCGL	GCW_02095	Uncharacterized protein	0.901	0.834	-0.0447	-0.223
311	tr|A0A0F6CKM9|A0A0F6CKM9_MYCGL	tr|A0A0F6CKM9|A0A0F6CKM9_MYCGL	tig	Trigger factor	0.899	0.886	0.0336	-0.0782
312	tr|A0A0F6CKN0|A0A0F6CKN0_MYCGL	tr|A0A0F6CKN0|A0A0F6CKN0_MYCGL	lon	Lon protease	0.907	0.862	-0.0133	0.0894
313	tr|A0A0F6CKN1|A0A0F6CKN1_MYCGL	tr|A0A0F6CKN1|A0A0F6CKN1_MYCGL	GCW_02110	ABC transporter permease	0.846	0.848	0.191	0.238
314	tr|A0A0F6CKN2|A0A0F6CKN2_MYCGL	tr|A0A0F6CKN2|A0A0F6CKN2_MYCGL	GCW_02115	ABC transporter ATP-binding protein	0.865	0.882	0.189	0.194
315	tr|A0A0F6CKN3|A0A0F6CKN3_MYCGL	tr|A0A0F6CKN3|A0A0F6CKN3_MYCGL	GCW_02135	Calcineurin-like phosphoesterase	0.907	0.801	0.0208	0.223
316	tr|A0A0F6CKN4|A0A0F6CKN4_MYCGL	tr|A0A0F6CKN4|A0A0F6CKN4_MYCGL	GCW_02140	5-formyltetrahydrofolate cyclo-ligase	0.91	0.878	0.0383	0.392
317	tr|A0A0F6CKN5|A0A0F6CKN5_MYCGL	tr|A0A0F6CKN5|A0A0F6CKN5_MYCGL	GCW_02150	RDD family protein	0.509	0.885	-0.624	-0.188
318	tr|A0A0F6CKN6|A0A0F6CKN6_MYCGL	tr|A0A0F6CKN6|A0A0F6CKN6_MYCGL	GCW_02155	Glycosyl transferase	0.881	0.903	0.191	0.143
319	tr|A0A0F6CKN7|A0A0F6CKN7_MYCGL	tr|A0A0F6CKN7|A0A0F6CKN7_MYCGL	GCW_02160	Uncharacterized protein	0.895	0.875	0.0631	0.153
320	tr|A0A0F6CKN8|A0A0F6CKN8_MYCGL	tr|A0A0F6CKN8|A0A0F6CKN8_MYCGL	GCW_02165	Uncharacterized protein	0.655	0.854	0.208	0.119
321	tr|A0A0F6CKN9|A0A0F6CKN9_MYCGL	tr|A0A0F6CKN9|A0A0F6CKN9_MYCGL	GCW_02170	Nitrogen fixation protein	0.89	0.841	-0.253	-0.709
322	tr|A0A0F6CKP1|A0A0F6CKP1_MYCGL	tr|A0A0F6CKP1|A0A0F6CKP1_MYCGL	GCW_02180	NGG1p interacting factor 3	0.91	0.918	-0.0145	-0.0138
323	tr|A0A0F6CKP2|A0A0F6CKP2_MYCGL	tr|A0A0F6CKP2|A0A0F6CKP2_MYCGL	GCW_02185	SAM-dependent methyltransferase	0.55	0.803	-0.365	-0.246
324	tr|A0A0F6CKP3|A0A0F6CKP3_MYCGL	tr|A0A0F6CKP3|A0A0F6CKP3_MYCGL	rpoD	RNA polymerase sigma factor SigA	0.91	0.906	-0.0147	-0.0652
325	tr|A0A0F6CKP4|A0A0F6CKP4_MYCGL	tr|A0A0F6CKP4|A0A0F6CKP4_MYCGL	dnaG	DNA primase	0.908	0.884	-0.0234	-0.128
326	tr|A0A0F6CKP5|A0A0F6CKP5_MYCGL	tr|A0A0F6CKP5|A0A0F6CKP5_MYCGL	glyS	Glycine--tRNA ligase	0.881	0.849	0.0632	0.13
327	tr|A0A0F6CKP6|A0A0F6CKP6_MYCGL	tr|A0A0F6CKP6|A0A0F6CKP6_MYCGL	recO	Recombinase	0.0563	0.321	-0.871	-0.707
328	tr|A0A0F6CKP7|A0A0F6CKP7_MYCGL	tr|A0A0F6CKP7|A0A0F6CKP7_MYCGL	era	GTPase Era	0.837	0.872	-0.294	-0.26
329	tr|A0A0F6CKP8|A0A0F6CKP8_MYCGL	tr|A0A0F6CKP8|A0A0F6CKP8_MYCGL	ybeY	Endoribonuclease YbeY	0.906	0.905	-0.069	-0.163
330	tr|A0A0F6CKQ1|A0A0F6CKQ1_MYCGL	tr|A0A0F6CKQ1|A0A0F6CKQ1_MYCGL	ftsZ	Cell division protein FtsZ	0.895	0.873	-0.0882	-0.213
331	tr|A0A0F6CKQ3|A0A0F6CKQ3_MYCGL	tr|A0A0F6CKQ3|A0A0F6CKQ3_MYCGL	mraW	Ribosomal RNA small subunit methyltransferase H	0.659	0.61	-0.355	-0.453
332	tr|A0A0F6CKQ5|A0A0F6CKQ5_MYCGL	tr|A0A0F6CKQ5|A0A0F6CKQ5_MYCGL	plsC	1-acyl-sn-glycerol-3-phosphate acyltransferase	0.666	0.834	0.288	0.196
333	tr|A0A0F6CKQ6|A0A0F6CKQ6_MYCGL	tr|A0A0F6CKQ6|A0A0F6CKQ6_MYCGL	acpS	Holo-[acyl-carrier-protein] synthase	0.727	0.785	0.333	0.333
334	tr|A0A0F6CKQ7|A0A0F6CKQ7_MYCGL	tr|A0A0F6CKQ7|A0A0F6CKQ7_MYCGL	GCW_02275	Uncharacterized protein	0.905	0.885	0.0399	0.159
335	tr|A0A0F6CKQ8|A0A0F6CKQ8_MYCGL	tr|A0A0F6CKQ8|A0A0F6CKQ8_MYCGL	GCW_02290	Uncharacterized protein	0.819	0.865	-0.225	-0.192
336	tr|A0A0F6CKQ9|A0A0F6CKQ9_MYCGL	tr|A0A0F6CKQ9|A0A0F6CKQ9_MYCGL	GCW_02295	Putative membrane protein LemA	0.905	0.908	-0.0204	-0.0363
337	tr|A0A0F6CKR0|A0A0F6CKR0_MYCGL	tr|A0A0F6CKR0|A0A0F6CKR0_MYCGL	GCW_02300	AAA ATPase containing von Willebrand factor type A (VWA) domain	0.864	0.842	-0.0934	0.151
338	tr|A0A0F6CKR1|A0A0F6CKR1_MYCGL	tr|A0A0F6CKR1|A0A0F6CKR1_MYCGL	nadD	Probable nicotinate-nucleotide adenylyltransferase	0.155	0.425	0.508	0.446
339	tr|A0A0F6CKR2|A0A0F6CKR2_MYCGL	tr|A0A0F6CKR2|A0A0F6CKR2_MYCGL	yqeH	Ribosome biogenesis GTPase YqeH	0.0717	0.0589	0.511	0.617
340	tr|A0A0F6CKR3|A0A0F6CKR3_MYCGL	tr|A0A0F6CKR3|A0A0F6CKR3_MYCGL	parC	DNA topoisomerase (ATP-hydrolyzing)	0.813	0.865	-0.205	-0.168
341	tr|A0A0F6CKR4|A0A0F6CKR4_MYCGL	tr|A0A0F6CKR4|A0A0F6CKR4_MYCGL	parE	DNA topoisomerase 4 subunit B	0.873	0.899	-0.0923	-0.0681
342	tr|A0A0F6CKR5|A0A0F6CKR5_MYCGL	tr|A0A0F6CKR5|A0A0F6CKR5_MYCGL	hup_2	Histone-like DNA-binding superfamily protein	0.0985	0.0987	0.678	0.797
343	tr|A0A0F6CKR6|A0A0F6CKR6_MYCGL	tr|A0A0F6CKR6|A0A0F6CKR6_MYCGL	GCW_02340	Uncharacterized protein	0.331	0.071	-0.442	-0.725
344	tr|A0A0F6CKR7|A0A0F6CKR7_MYCGL	tr|A0A0F6CKR7|A0A0F6CKR7_MYCGL	GCW_02350	XRE family transcriptional regulator	0.87	0.863	0.212	0.306
345	tr|A0A0F6CKS3|A0A0F6CKS3_MYCGL	tr|A0A0F6CKS3|A0A0F6CKS3_MYCGL	GCW_02410	VlhA.3.06 variable lipoprotein family protein	0.277	0.906	0.756	0.0913
346	tr|A0A0F6CKS4|A0A0F6CKS4_MYCGL	tr|A0A0F6CKS4|A0A0F6CKS4_MYCGL	GCW_02430	VlhA.1.05 variable lipoprotein family protein	0.875	0.632	-0.111	-0.415
347	tr|A0A0F6CKS6|A0A0F6CKS6_MYCGL	tr|A0A0F6CKS6|A0A0F6CKS6_MYCGL	GCW_02455	VlhA.1.01 variable lipoprotein family protein	0.148	0.502	-1.03	-0.829
348	tr|A0A0F6CKS8|A0A0F6CKS8_MYCGL	tr|A0A0F6CKS8|A0A0F6CKS8_MYCGL	GCW_02475	Uncharacterized protein	0.389	0.475	-0.873	-0.931
349	tr|A0A0F6CKS9|A0A0F6CKS9_MYCGL	tr|A0A0F6CKS9|A0A0F6CKS9_MYCGL	trkA	Potassium transporter	0.813	0.802	-0.16	-0.206
350	tr|A0A0F6CKT0|A0A0F6CKT0_MYCGL	tr|A0A0F6CKT0|A0A0F6CKT0_MYCGL	leuS	Leucine--tRNA ligase	0.855	0.907	0.111	0.0428
351	tr|A0A0F6CKT1|A0A0F6CKT1_MYCGL	tr|A0A0F6CKT1|A0A0F6CKT1_MYCGL	GCW_02490	Phospholipid-binding protein	0.87	0.921	0.163	-0.00107
352	tr|A0A0F6CKT2|A0A0F6CKT2_MYCGL	tr|A0A0F6CKT2|A0A0F6CKT2_MYCGL	GCW_02495	Phospholipid-binding protein	0.906	0.873	-0.0206	-0.108
353	tr|A0A0F6CKT3|A0A0F6CKT3_MYCGL	tr|A0A0F6CKT3|A0A0F6CKT3_MYCGL	GCW_02500	2,5-diketo-D-gluconic acid reductase	0.91	0.82	-0.0105	-0.167
354	tr|A0A0F6CKT4|A0A0F6CKT4_MYCGL	tr|A0A0F6CKT4|A0A0F6CKT4_MYCGL	GCW_02505	Uncharacterized protein	0.469	0.194	0.592	0.921
355	tr|A0A0F6CKT5|A0A0F6CKT5_MYCGL	tr|A0A0F6CKT5|A0A0F6CKT5_MYCGL	GCW_02510	Uncharacterized protein	0.902	0.785	-0.102	-0.679
356	tr|A0A0F6CKT6|A0A0F6CKT6_MYCGL	tr|A0A0F6CKT6|A0A0F6CKT6_MYCGL	GCW_02515	Uncharacterized protein	0.911	0.896	-0.0242	-0.184
357	tr|A0A0F6CKT7|A0A0F6CKT7_MYCGL	tr|A0A0F6CKT7|A0A0F6CKT7_MYCGL	pepC_1	Aminopeptidase	0.804	0.845	-0.161	-0.154
358	tr|A0A0F6CKT8|A0A0F6CKT8_MYCGL	tr|A0A0F6CKT8|A0A0F6CKT8_MYCGL	pepC_2	Aminopeptidase	0.842	0.854	-0.112	-0.127
359	tr|A0A0F6CKT9|A0A0F6CKT9_MYCGL	tr|A0A0F6CKT9|A0A0F6CKT9_MYCGL	smpB	SsrA-binding protein	0.756	0.873	-0.296	-0.171
360	tr|A0A0F6CKU0|A0A0F6CKU0_MYCGL	tr|A0A0F6CKU0|A0A0F6CKU0_MYCGL	GCW_02535	Uncharacterized protein	0.907	0.871	-0.0605	0.4
361	tr|A0A0F6CKU1|A0A0F6CKU1_MYCGL	tr|A0A0F6CKU1|A0A0F6CKU1_MYCGL	GCW_02540	Xaa-Pro aminopeptidase	0.818	0.847	0.109	-0.11
362	tr|A0A0F6CKU2|A0A0F6CKU2_MYCGL	tr|A0A0F6CKU2|A0A0F6CKU2_MYCGL	rpmG	50S ribosomal protein L33	0.891	0.896	-0.147	-0.188
363	tr|A0A0F6CKU3|A0A0F6CKU3_MYCGL	tr|A0A0F6CKU3|A0A0F6CKU3_MYCGL	arcA_2	Arginine deiminase	0.888	0.887	-0.0496	-0.0723
364	tr|A0A0F6CKU4|A0A0F6CKU4_MYCGL	tr|A0A0F6CKU4|A0A0F6CKU4_MYCGL	udk	Uridine kinase	0.893	0.904	-0.151	-0.155
365	tr|A0A0F6CKU5|A0A0F6CKU5_MYCGL	tr|A0A0F6CKU5|A0A0F6CKU5_MYCGL	GCW_02570	Uncharacterized protein	0.866	0.873	0.175	-0.212
366	tr|A0A0F6CKU7|A0A0F6CKU7_MYCGL	tr|A0A0F6CKU7|A0A0F6CKU7_MYCGL	GCW_02585	Uncharacterized protein	0.372	0.54	0.714	0.696
367	tr|A0A0F6CKU8|A0A0F6CKU8_MYCGL	tr|A0A0F6CKU8|A0A0F6CKU8_MYCGL	pepA	Peptidase M17	0.869	0.899	0.0809	-0.0559
368	tr|A0A0F6CKV0|A0A0F6CKV0_MYCGL	tr|A0A0F6CKV0|A0A0F6CKV0_MYCGL	vlhA.2.01	VlhA.2.01 variable lipoprotein family protein	0.86	0.827	-0.0827	-0.138
369	tr|A0A0F6CKV2|A0A0F6CKV2_MYCGL	tr|A0A0F6CKV2|A0A0F6CKV2_MYCGL	disA	Diadenylate cyclase	0.88	0.919	-0.171	0.0171
370	tr|A0A0F6CKV3|A0A0F6CKV3_MYCGL	tr|A0A0F6CKV3|A0A0F6CKV3_MYCGL	rnr	Ribonuclease R	0.868	0.903	0.0609	0.036
371	tr|A0A0F6CKV5|A0A0F6CKV5_MYCGL	tr|A0A0F6CKV5|A0A0F6CKV5_MYCGL	whiA	Probable cell division protein WhiA	0.9	0.913	0.37	0.277
372	tr|A0A0F6CKV6|A0A0F6CKV6_MYCGL	tr|A0A0F6CKV6|A0A0F6CKV6_MYCGL	trxB_2	Thioredoxin reductase	0.914	0.713	0.000645	-0.274
373	tr|A0A0F6CKV7|A0A0F6CKV7_MYCGL	tr|A0A0F6CKV7|A0A0F6CKV7_MYCGL	GCW_02645	GntR family HTH transcriptional regulator	0.793	0.666	-0.143	-0.243
374	tr|A0A0F6CKV8|A0A0F6CKV8_MYCGL	tr|A0A0F6CKV8|A0A0F6CKV8_MYCGL	GCW_02650	Uncharacterized protein	0.682	0.888	-0.365	-0.135
375	tr|A0A0F6CKV9|A0A0F6CKV9_MYCGL	tr|A0A0F6CKV9|A0A0F6CKV9_MYCGL	ygjD	tRNA N6-adenosine threonylcarbamoyltransferase	0.668	0.759	-0.206	-0.197
376	tr|A0A0F6CKW0|A0A0F6CKW0_MYCGL	tr|A0A0F6CKW0|A0A0F6CKW0_MYCGL	potD	Spermidine/putrescine ABC transportersubstrate-binding protein	0.895	0.886	-0.0492	0.0968
377	tr|A0A0F6CKW1|A0A0F6CKW1_MYCGL	tr|A0A0F6CKW1|A0A0F6CKW1_MYCGL	potC	Spermidine/putrescine ABC transporter permease	0.9	0.846	0.0899	0.388
378	tr|A0A0F6CKW2|A0A0F6CKW2_MYCGL	tr|A0A0F6CKW2|A0A0F6CKW2_MYCGL	potB	Spermidine/putrescine ABC transporter permease	0.902	0.916	-0.198	-0.0989
379	tr|A0A0F6CKW3|A0A0F6CKW3_MYCGL	tr|A0A0F6CKW3|A0A0F6CKW3_MYCGL	potA	Spermidine/putrescine import ATP-binding protein PotA	0.666	0.891	-0.26	-0.0853
380	tr|A0A0F6CKW4|A0A0F6CKW4_MYCGL	tr|A0A0F6CKW4|A0A0F6CKW4_MYCGL	GCW_02685	Uncharacterized protein	0.889	0.88	0.0552	-0.0981
381	tr|A0A0F6CKW5|A0A0F6CKW5_MYCGL	tr|A0A0F6CKW5|A0A0F6CKW5_MYCGL	rny	Ribonuclease Y	0.702	0.747	-0.248	-0.263
382	tr|A0A0F6CKW6|A0A0F6CKW6_MYCGL	tr|A0A0F6CKW6|A0A0F6CKW6_MYCGL	recA	Protein RecA	0.813	0.524	-0.41	-0.943
383	tr|A0A0F6CKW8|A0A0F6CKW8_MYCGL	tr|A0A0F6CKW8|A0A0F6CKW8_MYCGL	msrB	Peptide methionine sulfoxide reductase MsrB	0.505	0.828	-0.252	-0.141
384	tr|A0A0F6CKW9|A0A0F6CKW9_MYCGL	tr|A0A0F6CKW9|A0A0F6CKW9_MYCGL	groEL	60 kDa chaperonin	0.774	0.744	-0.196	-0.259
385	tr|A0A0F6CKX0|A0A0F6CKX0_MYCGL	tr|A0A0F6CKX0|A0A0F6CKX0_MYCGL	groES	10 kDa chaperonin	0.868	0.66	-0.111	-0.351
386	tr|A0A0F6CKX1|A0A0F6CKX1_MYCGL	tr|A0A0F6CKX1|A0A0F6CKX1_MYCGL	pykF	Pyruvate kinase	0.53	0.517	-0.254	-0.301
387	tr|A0A0F6CKX2|A0A0F6CKX2_MYCGL	tr|A0A0F6CKX2|A0A0F6CKX2_MYCGL	pfkA	6-phosphofructokinase	0.871	0.822	-0.102	-0.208
388	tr|A0A0F6CKX3|A0A0F6CKX3_MYCGL	tr|A0A0F6CKX3|A0A0F6CKX3_MYCGL	lplA	Lipoate--protein ligase	0.897	0.809	-0.0491	-0.223
389	tr|A0A0F6CKX4|A0A0F6CKX4_MYCGL	tr|A0A0F6CKX4|A0A0F6CKX4_MYCGL	lpd	Dihydrolipoyl dehydrogenase	0.294	0.433	-0.303	-0.307
390	tr|A0A0F6CKX5|A0A0F6CKX5_MYCGL	tr|A0A0F6CKX5|A0A0F6CKX5_MYCGL	aceF	Dihydrolipoamide acetyltransferase component of pyruvate dehydrogenase complex	0.393	0.372	-0.398	-0.472
391	tr|A0A0F6CKX7|A0A0F6CKX7_MYCGL	tr|A0A0F6CKX7|A0A0F6CKX7_MYCGL	acoA	Pyruvate dehydrogenase E1 component subunit alpha	0.733	0.0275	-0.16	-0.518
392	tr|A0A0F6CKX9|A0A0F6CKX9_MYCGL	tr|A0A0F6CKX9|A0A0F6CKX9_MYCGL	ackA	Acetate kinase	0.891	0.773	-0.0362	-0.148
393	tr|A0A0F6CKY0|A0A0F6CKY0_MYCGL	tr|A0A0F6CKY0|A0A0F6CKY0_MYCGL	trkG	Cation transporter	0.899	0.916	-0.0997	-0.044
394	tr|A0A0F6CKY1|A0A0F6CKY1_MYCGL	tr|A0A0F6CKY1|A0A0F6CKY1_MYCGL	GCW_02770	CBS domain and DUF21 protein	0.662	0.563	-0.537	-0.734
395	tr|A0A0F6CKY2|A0A0F6CKY2_MYCGL	tr|A0A0F6CKY2|A0A0F6CKY2_MYCGL	GCW_02775	Deoxyguanosine kinase	0.558	0.226	-0.272	-0.449
396	tr|A0A0F6CKY3|A0A0F6CKY3_MYCGL	tr|A0A0F6CKY3|A0A0F6CKY3_MYCGL	GCW_02780	Deoxyguanosine kinase	0.906	0.92	0.0277	-0.002
397	tr|A0A0F6CKY4|A0A0F6CKY4_MYCGL	tr|A0A0F6CKY4|A0A0F6CKY4_MYCGL	clpB	ClpB chaperone	0.338	0.238	0.241	0.309
398	tr|A0A0F6CKY5|A0A0F6CKY5_MYCGL	tr|A0A0F6CKY5|A0A0F6CKY5_MYCGL	plsX	Phosphate acyltransferase	0.787	0.902	-0.25	-0.0797
399	tr|A0A0F6CKY6|A0A0F6CKY6_MYCGL	tr|A0A0F6CKY6|A0A0F6CKY6_MYCGL	GCW_02800	Dihydroxyacetone kinase, DAK2 domain fusion protein YloV	0.631	0.74	-0.216	-0.203
400	tr|A0A0F6CKY7|A0A0F6CKY7_MYCGL	tr|A0A0F6CKY7|A0A0F6CKY7_MYCGL	GCW_02805	Uncharacterized protein	0.882	0.914	-0.318	-0.101
401	tr|A0A0F6CKY8|A0A0F6CKY8_MYCGL	tr|A0A0F6CKY8|A0A0F6CKY8_MYCGL	rluA_2	Pseudouridine synthase	0.613	0.341	0.319	0.505
402	tr|A0A0F6CKY9|A0A0F6CKY9_MYCGL	tr|A0A0F6CKY9|A0A0F6CKY9_MYCGL	spoU	rRNA methyltransferase	0.909	0.218	0.00816	0.318
403	tr|A0A0F6CKZ0|A0A0F6CKZ0_MYCGL	tr|A0A0F6CKZ0|A0A0F6CKZ0_MYCGL	GCW_02820	Exopolyphosphatase-related protein	0.906	0.864	-0.0299	0.188
404	tr|A0A0F6CKZ1|A0A0F6CKZ1_MYCGL	tr|A0A0F6CKZ1|A0A0F6CKZ1_MYCGL	thiI	Probable tRNA sulfurtransferase	0.679	0.637	0.335	0.426
405	tr|A0A0F6CKZ2|A0A0F6CKZ2_MYCGL	tr|A0A0F6CKZ2|A0A0F6CKZ2_MYCGL	GCW_02830	YqaJ-like viral recombinase domain protein	0.486	0.801	-0.526	-0.332
406	tr|A0A0F6CKZ3|A0A0F6CKZ3_MYCGL	tr|A0A0F6CKZ3|A0A0F6CKZ3_MYCGL	GCW_02835	Uncharacterized protein	0.85	0.897	-0.175	-0.104
407	tr|A0A0F6CKZ4|A0A0F6CKZ4_MYCGL	tr|A0A0F6CKZ4|A0A0F6CKZ4_MYCGL	GCW_02855	RNA helicase	0.887	0.876	-0.0935	0.164
408	tr|A0A0F6CKZ5|A0A0F6CKZ5_MYCGL	tr|A0A0F6CKZ5|A0A0F6CKZ5_MYCGL	eno	Enolase	0.754	0.198	-0.201	-0.507
409	tr|A0A0F6CKZ6|A0A0F6CKZ6_MYCGL	tr|A0A0F6CKZ6|A0A0F6CKZ6_MYCGL	GCW_02865	Membrane protein DUF1673	0.696	0.89	0.286	-0.103
410	tr|A0A0F6CKZ7|A0A0F6CKZ7_MYCGL	tr|A0A0F6CKZ7|A0A0F6CKZ7_MYCGL	GCW_02870	Histidine triad nucleotide-binding protein	0.904	0.784	-0.0321	-0.267
411	tr|A0A0F6CKZ8|A0A0F6CKZ8_MYCGL	tr|A0A0F6CKZ8|A0A0F6CKZ8_MYCGL	GCW_02875	ER membrane protein SH3, eukaryotic protein	0.831	0.715	-0.14	-0.269
412	tr|A0A0F6CKZ9|A0A0F6CKZ9_MYCGL	tr|A0A0F6CKZ9|A0A0F6CKZ9_MYCGL	nusB	Transcription termination factor NusB	0.913	0.915	0.00779	-0.0685
413	tr|A0A0F6CL00|A0A0F6CL00_MYCGL	tr|A0A0F6CL00|A0A0F6CL00_MYCGL	GCW_02885	The alpha-D-phosphohexomutase superfamily protein	0.873	0.801	-0.238	-0.558
414	tr|A0A0F6CL01|A0A0F6CL01_MYCGL	tr|A0A0F6CL01|A0A0F6CL01_MYCGL	efp	Elongation factor P	0.906	0.851	-0.0224	-0.159
415	tr|A0A0F6CL02|A0A0F6CL02_MYCGL	tr|A0A0F6CL02|A0A0F6CL02_MYCGL	dppF	Peptide ABC transporter ATP-binding protein	0.561	0.842	0.242	0.131
416	tr|A0A0F6CL03|A0A0F6CL03_MYCGL	tr|A0A0F6CL03|A0A0F6CL03_MYCGL	dppD	Peptide ABC transporter ATP-binding protein	0.902	0.902	-0.0366	0.0649
417	tr|A0A0F6CL06|A0A0F6CL06_MYCGL	tr|A0A0F6CL06|A0A0F6CL06_MYCGL	GCW_02930	Uncharacterized protein	0.553	0.0995	0.278	0.548
418	tr|A0A0F6CL08|A0A0F6CL08_MYCGL	tr|A0A0F6CL08|A0A0F6CL08_MYCGL	dppF	ABC transporter ATP-binding protein	0.383	0.609	0.284	0.256
419	tr|A0A0F6CL09|A0A0F6CL09_MYCGL	tr|A0A0F6CL09|A0A0F6CL09_MYCGL	dppD	Peptide ABC transporter ATP-binding protein	0.562	0.888	0.229	0.0692
420	tr|A0A0F6CL11|A0A0F6CL11_MYCGL	tr|A0A0F6CL11|A0A0F6CL11_MYCGL	dppB	ABC transporter permease	0.822	0.674	0.118	0.231
421	tr|A0A0F6CL12|A0A0F6CL12_MYCGL	tr|A0A0F6CL12|A0A0F6CL12_MYCGL	oppA	Peptide ABC transporter substrate-bindingprotein	0.404	0.406	0.217	0.252
422	tr|A0A0F6CL13|A0A0F6CL13_MYCGL	tr|A0A0F6CL13|A0A0F6CL13_MYCGL	GCW_02965	Uncharacterized protein	0.338	0.669	0.267	0.209
423	tr|A0A0F6CL14|A0A0F6CL14_MYCGL	tr|A0A0F6CL14|A0A0F6CL14_MYCGL	rpsB	30S ribosomal protein S2	0.676	0.475	0.2	0.311
424	tr|A0A0F6CL15|A0A0F6CL15_MYCGL	tr|A0A0F6CL15|A0A0F6CL15_MYCGL	azoR	FMN-dependent NADH-azoreductase	0.885	0.906	0.0556	-0.0398
425	tr|A0A0F6CL16|A0A0F6CL16_MYCGL	tr|A0A0F6CL16|A0A0F6CL16_MYCGL	GCW_02985	Prominin-like protein, eukaryotic transmembrane protein, stem-cell marker	0.528	0.335	0.263	0.373
426	tr|A0A0F6CL17|A0A0F6CL17_MYCGL	tr|A0A0F6CL17|A0A0F6CL17_MYCGL	rarA	Recombination AAA ATPase RarA	0.823	0.859	-0.227	-0.212
427	tr|A0A0F6CL18|A0A0F6CL18_MYCGL	tr|A0A0F6CL18|A0A0F6CL18_MYCGL	rsmI	16S rRNA (Cytidine-2-O-)-methyltransferase RsmI	0.00548	0.786	-0.454	-0.142
428	tr|A0A0F6CL19|A0A0F6CL19_MYCGL	tr|A0A0F6CL19|A0A0F6CL19_MYCGL	osmC_2	Peroxyredoxin osmC-like protein	0.429	0.732	0.29	0.216
429	tr|A0A0F6CL20|A0A0F6CL20_MYCGL	tr|A0A0F6CL20|A0A0F6CL20_MYCGL	rpmB	50S ribosomal protein L28	0.769	0.908	0.29	0.0625
430	tr|A0A0F6CL21|A0A0F6CL21_MYCGL	tr|A0A0F6CL21|A0A0F6CL21_MYCGL	GCW_03015	Uncharacterized protein	0.729	0.705	0.261	0.329
431	tr|A0A0F6CL22|A0A0F6CL22_MYCGL	tr|A0A0F6CL22|A0A0F6CL22_MYCGL	pvpA	Phase-variant protein A (PvpA) domain-containingprotein	0.261	0.735	0.762	0.48
432	tr|A0A0F6CL23|A0A0F6CL23_MYCGL	tr|A0A0F6CL23|A0A0F6CL23_MYCGL	fusA	Elongation factor G	0.785	0.691	0.133	0.208
433	tr|A0A0F6CL24|A0A0F6CL24_MYCGL	tr|A0A0F6CL24|A0A0F6CL24_MYCGL	rpsG	30S ribosomal protein S7	0.908	0.919	-0.0198	0.00668
434	tr|A0A0F6CL25|A0A0F6CL25_MYCGL	tr|A0A0F6CL25|A0A0F6CL25_MYCGL	rpsL	30S ribosomal protein S12	0.717	0.853	0.2	-0.13
435	tr|A0A0F6CL26|A0A0F6CL26_MYCGL	tr|A0A0F6CL26|A0A0F6CL26_MYCGL	rpsD	30S ribosomal protein S4	0.503	0.542	0.33	0.368
436	tr|A0A0F6CL27|A0A0F6CL27_MYCGL	tr|A0A0F6CL27|A0A0F6CL27_MYCGL	GCW_03045	Uncharacterized protein	0.907	0.852	0.0138	0.108
437	tr|A0A0F6CL28|A0A0F6CL28_MYCGL	tr|A0A0F6CL28|A0A0F6CL28_MYCGL	GCW_03070	DUF31 domain-containing protein	0.0908	0.127	0.737	0.817
438	tr|A0A0F6CL29|A0A0F6CL29_MYCGL	tr|A0A0F6CL29|A0A0F6CL29_MYCGL	dnaK	Chaperone protein DnaK	0.778	0.855	0.157	0.121
439	tr|A0A0F6CL31|A0A0F6CL31_MYCGL	tr|A0A0F6CL31|A0A0F6CL31_MYCGL	GCW_03085	Ion channel protein	0.905	0.808	0.0458	0.39
440	tr|A0A0F6CL32|A0A0F6CL32_MYCGL	tr|A0A0F6CL32|A0A0F6CL32_MYCGL	mscL	Large conductance mechanosensitive channel protein MscL	0.583	0.42	0.263	-0.369
441	tr|A0A0F6CL34|A0A0F6CL34_MYCGL	tr|A0A0F6CL34|A0A0F6CL34_MYCGL	ptsG_2	PTS sugar transporter subunit IIA	0.793	0.805	0.288	0.332
442	tr|A0A0F6CL35|A0A0F6CL35_MYCGL	tr|A0A0F6CL35|A0A0F6CL35_MYCGL	spxA	Regulatory protein	0.91	0.846	-0.0136	-0.179
443	tr|A0A0F6CL36|A0A0F6CL36_MYCGL	tr|A0A0F6CL36|A0A0F6CL36_MYCGL	trpS	Tryptophan--tRNA ligase	0.704	0.85	0.261	0.169
444	tr|A0A0F6CL37|A0A0F6CL37_MYCGL	tr|A0A0F6CL37|A0A0F6CL37_MYCGL	GCW_03120	Haloacid dehalogenase	0.91	0.879	0.00696	-0.065
445	tr|A0A0F6CL38|A0A0F6CL38_MYCGL	tr|A0A0F6CL38|A0A0F6CL38_MYCGL	GCW_03125	Haloacid dehalogenase	0.881	0.91	-0.096	-0.0469
446	tr|A0A0F6CL39|A0A0F6CL39_MYCGL	tr|A0A0F6CL39|A0A0F6CL39_MYCGL	GCW_03130	Uncharacterized protein	0.896	0.863	0.193	0.555
447	tr|A0A0F6CL40|A0A0F6CL40_MYCGL	tr|A0A0F6CL40|A0A0F6CL40_MYCGL	GCW_03135	Cytadherence high molecular weight protein 1	0.888	0.716	-0.0418	-0.181
448	tr|A0A0F6CL42|A0A0F6CL42_MYCGL	tr|A0A0F6CL42|A0A0F6CL42_MYCGL	lepA	Elongation factor 4	0.829	0.783	-0.128	-0.199
449	tr|A0A0F6CL43|A0A0F6CL43_MYCGL	tr|A0A0F6CL43|A0A0F6CL43_MYCGL	GCW_03150	Uncharacterized protein	0.9	0.691	0.0507	0.382
450	tr|A0A0F6CL44|A0A0F6CL44_MYCGL	tr|A0A0F6CL44|A0A0F6CL44_MYCGL	GCW_03155	Uncharacterized protein	0.876	0.876	0.199	0.27
451	tr|A0A0F6CL45|A0A0F6CL45_MYCGL	tr|A0A0F6CL45|A0A0F6CL45_MYCGL	GCW_03160	Uncharacterized protein	0.163	0.371	0.694	0.649
452	tr|A0A0F6CL46|A0A0F6CL46_MYCGL	tr|A0A0F6CL46|A0A0F6CL46_MYCGL	GCW_03165	Uncharacterized protein	0.571	0.127	-0.239	-0.461
453	tr|A0A0F6CL47|A0A0F6CL47_MYCGL	tr|A0A0F6CL47|A0A0F6CL47_MYCGL	GCW_03170	Uncharacterized protein	0.777	0.36	-0.139	-0.32
454	tr|A0A0F6CL49|A0A0F6CL49_MYCGL	tr|A0A0F6CL49|A0A0F6CL49_MYCGL	GCW_03185	Sialidase	0.899	0.893	0.177	0.364
455	tr|A0A0F6CL52|A0A0F6CL52_MYCGL	tr|A0A0F6CL52|A0A0F6CL52_MYCGL	GCW_03205	Uncharacterized protein	0.872	0.864	0.141	0.209
456	tr|A0A0F6CL53|A0A0F6CL53_MYCGL	tr|A0A0F6CL53|A0A0F6CL53_MYCGL	GCW_03210	DNA polymerase III subunit delta	0.806	0.913	-0.416	-0.0696
457	tr|A0A0F6CL55|A0A0F6CL55_MYCGL	tr|A0A0F6CL55|A0A0F6CL55_MYCGL	valS	Valine--tRNA ligase	0.908	0.918	-0.012	0.00722
458	tr|A0A0F6CL56|A0A0F6CL56_MYCGL	tr|A0A0F6CL56|A0A0F6CL56_MYCGL	ysxC	Probable GTP-binding protein EngB	0.548	0.813	-0.365	-0.234
459	tr|A0A0F6CL57|A0A0F6CL57_MYCGL	tr|A0A0F6CL57|A0A0F6CL57_MYCGL	GCW_03230	Putative ribosomal protein	0.903	0.78	-0.0678	0.495
460	tr|A0A0F6CL58|A0A0F6CL58_MYCGL	tr|A0A0F6CL58|A0A0F6CL58_MYCGL	tktA_2	Transketolase	0.884	0.869	-0.0829	-0.148
461	tr|A0A0F6CL59|A0A0F6CL59_MYCGL	tr|A0A0F6CL59|A0A0F6CL59_MYCGL	GCW_03240	Glycosyl transferase	0.885	0.912	0.0593	0.0261
462	tr|A0A0F6CL60|A0A0F6CL60_MYCGL	tr|A0A0F6CL60|A0A0F6CL60_MYCGL	umuC	DNA polymerase IV	0.858	0.916	0.191	0.0281
463	tr|A0A0F6CL61|A0A0F6CL61_MYCGL	tr|A0A0F6CL61|A0A0F6CL61_MYCGL	rnmV	Ribonuclease M5	0.866	0.834	-0.43	-0.752
464	tr|A0A0F6CL63|A0A0F6CL63_MYCGL	tr|A0A0F6CL63|A0A0F6CL63_MYCGL	truA	tRNA pseudouridine synthase A	0.875	0.895	-0.184	-0.163
465	tr|A0A0F6CL64|A0A0F6CL64_MYCGL	tr|A0A0F6CL64|A0A0F6CL64_MYCGL	cbiQ	ABC transporter permease	0.855	0.89	0.217	0.166
466	tr|A0A0F6CL65|A0A0F6CL65_MYCGL	tr|A0A0F6CL65|A0A0F6CL65_MYCGL	cbiO	Energy-coupling factor transporter ATP-binding protein EcfA	0.903	0.913	0.0298	-0.0281
467	tr|A0A0F6CL66|A0A0F6CL66_MYCGL	tr|A0A0F6CL66|A0A0F6CL66_MYCGL	cbiO	Energy-coupling factor transporter ATP-binding protein EcfA	0.638	0.563	0.237	0.31
468	tr|A0A0F6CL67|A0A0F6CL67_MYCGL	tr|A0A0F6CL67|A0A0F6CL67_MYCGL	gpmI	2,3-bisphosphoglycerate-independent phosphoglycerate mutase	0.899	0.867	0.0261	-0.0874
469	tr|A0A0F6CL68|A0A0F6CL68_MYCGL	tr|A0A0F6CL68|A0A0F6CL68_MYCGL	tpiA	Triosephosphate isomerase	0.912	0.883	-0.00388	-0.0722
470	tr|A0A0F6CL69|A0A0F6CL69_MYCGL	tr|A0A0F6CL69|A0A0F6CL69_MYCGL	cpsG	Phosphohexomutase/phosphomannomutase	0.223	0.834	0.318	0.129
471	tr|A0A0F6CL70|A0A0F6CL70_MYCGL	tr|A0A0F6CL70|A0A0F6CL70_MYCGL	cdd	Cytidine deaminase	0.872	0.879	0.141	-0.169
472	tr|A0A0F6CL71|A0A0F6CL71_MYCGL	tr|A0A0F6CL71|A0A0F6CL71_MYCGL	deoA	Thymidine phosphorylase	0.788	0.882	-0.198	-0.111
473	tr|A0A0F6CL73|A0A0F6CL73_MYCGL	tr|A0A0F6CL73|A0A0F6CL73_MYCGL	deoD	Purine-nucleoside phosphorylase	0.887	0.892	-0.0708	-0.0906
474	tr|A0A0F6CL74|A0A0F6CL74_MYCGL	tr|A0A0F6CL74|A0A0F6CL74_MYCGL	GCW_03320	ABC transporter permease	0.898	0.906	-0.179	-0.203
475	tr|A0A0F6CL75|A0A0F6CL75_MYCGL	tr|A0A0F6CL75|A0A0F6CL75_MYCGL	GCW_03325	ABC transporter permease	0.901	0.878	-0.13	0.411
476	tr|A0A0F6CL76|A0A0F6CL76_MYCGL	tr|A0A0F6CL76|A0A0F6CL76_MYCGL	GCW_03330	Sugar ABC transporter ATP-binding protein	0.907	0.911	-0.0196	0.0342
477	tr|A0A0F6CL78|A0A0F6CL78_MYCGL	tr|A0A0F6CL78|A0A0F6CL78_MYCGL	GCW_03345	VlhA.1.06 variable lipoprotein family protein	0.478	0.392	-0.908	-1.15
478	tr|A0A0F6CL80|A0A0F6CL80_MYCGL	tr|A0A0F6CL80|A0A0F6CL80_MYCGL	GCW_03360	VlhA.1.01 variable lipoprotein family protein	0.0896	0.456	-2.17	-1.66
479	tr|A0A0F6CL81|A0A0F6CL81_MYCGL	tr|A0A0F6CL81|A0A0F6CL81_MYCGL	GCW_03370	VlhA.3.06 variable lipoprotein family protein	0.556	0.174	-0.5	-0.888
480	tr|A0A0F6CL83|A0A0F6CL83_MYCGL	tr|A0A0F6CL83|A0A0F6CL83_MYCGL	recR	Recombination protein RecR	0.79	0.866	0.347	0.251
481	tr|A0A0F6CL84|A0A0F6CL84_MYCGL	tr|A0A0F6CL84|A0A0F6CL84_MYCGL	ybaB	Nucleoid-associated protein GCW_03390	0.891	0.851	0.0587	-0.157
482	tr|A0A0F6CL85|A0A0F6CL85_MYCGL	tr|A0A0F6CL85|A0A0F6CL85_MYCGL	dnaX	DNA polymerase III subunit gamma/tau	0.798	0.214	-0.117	-0.346
483	tr|A0A0F6CL86|A0A0F6CL86_MYCGL	tr|A0A0F6CL86|A0A0F6CL86_MYCGL	GCW_03400	Uncharacterized protein	0.169	0.863	0.332	0.0978
484	tr|A0A0F6CL87|A0A0F6CL87_MYCGL	tr|A0A0F6CL87|A0A0F6CL87_MYCGL	ruvB	Holliday junction ATP-dependent DNA helicase RuvB	0.658	0.885	-0.812	-0.302
485	tr|A0A0F6CL89|A0A0F6CL89_MYCGL	tr|A0A0F6CL89|A0A0F6CL89_MYCGL	GCW_03415	Uncharacterized protein	0.795	0.712	-0.282	-0.442
486	tr|A0A0F6CL90|A0A0F6CL90_MYCGL	tr|A0A0F6CL90|A0A0F6CL90_MYCGL	gatB	Aspartyl/glutamyl-tRNA(Asn/Gln) amidotransferase subunit B	0.895	0.903	-0.033	-0.0387
487	tr|A0A0F6CL91|A0A0F6CL91_MYCGL	tr|A0A0F6CL91|A0A0F6CL91_MYCGL	gatA	Aspartyl/glutamyl-tRNA amidotransferase subunitA	0.655	0.858	0.185	0.101
488	tr|A0A0F6CL92|A0A0F6CL92_MYCGL	tr|A0A0F6CL92|A0A0F6CL92_MYCGL	gatC	Aspartyl/glutamyl-tRNA amidotransferase subunitC	0.862	0.889	0.119	0.0999
489	tr|A0A0F6CL94|A0A0F6CL94_MYCGL	tr|A0A0F6CL94|A0A0F6CL94_MYCGL	GCW_03440	Uncharacterized protein	0.913	0.907	0.00401	-0.0529
490	tr|A0A0F6CL95|A0A0F6CL95_MYCGL	tr|A0A0F6CL95|A0A0F6CL95_MYCGL	dnaB	DNA helicase	0.847	0.852	0.112	0.137
491	tr|A0A0F6CL96|A0A0F6CL96_MYCGL	tr|A0A0F6CL96|A0A0F6CL96_MYCGL	rplI	50S ribosomal protein L9	0.887	0.864	0.0983	0.202
492	tr|A0A0F6CL97|A0A0F6CL97_MYCGL	tr|A0A0F6CL97|A0A0F6CL97_MYCGL	rpsR	30S ribosomal protein S18	0.153	0.213	0.731	0.797
493	tr|A0A0F6CL98|A0A0F6CL98_MYCGL	tr|A0A0F6CL98|A0A0F6CL98_MYCGL	ssb	Single-stranded DNA-binding protein	0.895	0.789	0.0409	0.187
494	tr|A0A0F6CL99|A0A0F6CL99_MYCGL	tr|A0A0F6CL99|A0A0F6CL99_MYCGL	rpsF	30S ribosomal protein S6	0.0311	0.712	0.556	0.256
495	tr|A0A0F6CLA0|A0A0F6CLA0_MYCGL	tr|A0A0F6CLA0|A0A0F6CLA0_MYCGL	asnA	Aspartate--ammonia ligase	0.881	0.885	-0.0614	0.0792
496	tr|A0A0F6CLA1|A0A0F6CLA1_MYCGL	tr|A0A0F6CLA1|A0A0F6CLA1_MYCGL	GCW_03475	Nicotinate phosphoribosyltransferase	0.821	0.711	0.189	0.343
497	tr|A0A0F6CLA2|A0A0F6CLA2_MYCGL	tr|A0A0F6CLA2|A0A0F6CLA2_MYCGL	GCW_03485	Mg296 domain-containing protein	0.827	0.716	0.274	0.508
498	tr|A0A0F6CLA4|A0A0F6CLA4_MYCGL	tr|A0A0F6CLA4|A0A0F6CLA4_MYCGL	eutD	Phosphotransacetylase	0.603	0.0902	-0.283	-0.607
499	tr|A0A0F6CLA5|A0A0F6CLA5_MYCGL	tr|A0A0F6CLA5|A0A0F6CLA5_MYCGL	rbgA	Ribosome biogenesis GTPase A	0.907	0.901	0.0335	0.098
500	tr|A0A0F6CLA6|A0A0F6CLA6_MYCGL	tr|A0A0F6CLA6|A0A0F6CLA6_MYCGL	GCW_03505	DUF2179 domain-containing protein	0.639	0.857	0.542	0.292
501	tr|A0A0F6CLA7|A0A0F6CLA7_MYCGL	tr|A0A0F6CLA7|A0A0F6CLA7_MYCGL	rplS	50S ribosomal protein L19	0.386	0.659	0.596	0.498
502	tr|A0A0F6CLA8|A0A0F6CLA8_MYCGL	tr|A0A0F6CLA8|A0A0F6CLA8_MYCGL	trmD	tRNA (guanine-N(1)-)-methyltransferase	0.829	0.805	0.179	0.253
503	tr|A0A0F6CLA9|A0A0F6CLA9_MYCGL	tr|A0A0F6CLA9|A0A0F6CLA9_MYCGL	rpsP	30S ribosomal protein S16	0.772	0.834	0.254	0.227
504	tr|A0A0F6CLB0|A0A0F6CLB0_MYCGL	tr|A0A0F6CLB0|A0A0F6CLB0_MYCGL	rplQ	50S ribosomal protein L17	0.816	0.567	-0.188	0.418
505	tr|A0A0F6CLB1|A0A0F6CLB1_MYCGL	tr|A0A0F6CLB1|A0A0F6CLB1_MYCGL	rpoA	DNA-directed RNA polymerase subunit alpha	0.911	0.912	-0.00818	0.0291
506	tr|A0A0F6CLB2|A0A0F6CLB2_MYCGL	tr|A0A0F6CLB2|A0A0F6CLB2_MYCGL	rpsK	30S ribosomal protein S11	0.787	0.656	0.3	0.508
507	tr|A0A0F6CLB3|A0A0F6CLB3_MYCGL	tr|A0A0F6CLB3|A0A0F6CLB3_MYCGL	rpsM	30S ribosomal protein S13	0.862	0.708	0.0857	0.227
508	tr|A0A0F6CLB5|A0A0F6CLB5_MYCGL	tr|A0A0F6CLB5|A0A0F6CLB5_MYCGL	infA	Translation initiation factor IF-1	0.911	0.886	-0.0306	0.327
509	tr|A0A0F6CLB6|A0A0F6CLB6_MYCGL	tr|A0A0F6CLB6|A0A0F6CLB6_MYCGL	trxA_2	Thioredoxin	0.907	0.91	-0.0245	-0.0439
510	tr|A0A0F6CLB7|A0A0F6CLB7_MYCGL	tr|A0A0F6CLB7|A0A0F6CLB7_MYCGL	topA	DNA topoisomerase 1	0.812	0.906	-0.13	-0.0382
511	tr|A0A0F6CLB8|A0A0F6CLB8_MYCGL	tr|A0A0F6CLB8|A0A0F6CLB8_MYCGL	rpe	Ribulose-phosphate 3-epimerase	0.707	0.902	0.288	0.0706
512	tr|A0A0F6CLB9|A0A0F6CLB9_MYCGL	tr|A0A0F6CLB9|A0A0F6CLB9_MYCGL	pgi	Glucose-6-phosphate isomerase	0.727	0.832	0.139	0.109
513	tr|A0A0F6CLC0|A0A0F6CLC0_MYCGL	tr|A0A0F6CLC0|A0A0F6CLC0_MYCGL	rsgA	Small ribosomal subunit biogenesis GTPase RsgA	0.901	0.918	-0.165	-0.0516
514	tr|A0A0F6CLC1|A0A0F6CLC1_MYCGL	tr|A0A0F6CLC1|A0A0F6CLC1_MYCGL	GCW_03585	Serine/threonine protein kinase	0.911	0.904	-0.0126	-0.0944
515	tr|A0A0F6CLC2|A0A0F6CLC2_MYCGL	tr|A0A0F6CLC2|A0A0F6CLC2_MYCGL	ptc1	PP2C-like serine/threonine protein phosphatase	0.897	0.851	0.064	-0.218
516	tr|A0A0F6CLC3|A0A0F6CLC3_MYCGL	tr|A0A0F6CLC3|A0A0F6CLC3_MYCGL	gmk	Guanylate kinase	0.415	0.0661	-0.546	-0.982
517	tr|A0A0F6CLC4|A0A0F6CLC4_MYCGL	tr|A0A0F6CLC4|A0A0F6CLC4_MYCGL	def	Peptide deformylase	0.295	0.0931	-0.325	-0.494
518	tr|A0A0F6CLC5|A0A0F6CLC5_MYCGL	tr|A0A0F6CLC5|A0A0F6CLC5_MYCGL	GCW_03605	MFS transporter	0.898	0.911	0.0822	0.0662
519	tr|A0A0F6CLC6|A0A0F6CLC6_MYCGL	tr|A0A0F6CLC6|A0A0F6CLC6_MYCGL	gidA	tRNA uridine 5-carboxymethylaminomethyl modification enzyme MnmG	0.804	0.88	-0.141	-0.0896
520	tr|A0A0F6CLC7|A0A0F6CLC7_MYCGL	tr|A0A0F6CLC7|A0A0F6CLC7_MYCGL	GCW_03620	AAA_31 domain-containing protein	0.81	0.73	0.18	0.291
521	tr|A0A0F6CLC8|A0A0F6CLC8_MYCGL	tr|A0A0F6CLC8|A0A0F6CLC8_MYCGL	GCW_03625	Uncharacterized protein	0.882	0.757	0.124	0.409
522	tr|A0A0F6CLC9|A0A0F6CLC9_MYCGL	tr|A0A0F6CLC9|A0A0F6CLC9_MYCGL	nusG	Transcription termination/antitermination protein NusG	0.912	0.915	-0.0058	0.0194
523	tr|A0A0F6CLD1|A0A0F6CLD1_MYCGL	tr|A0A0F6CLD1|A0A0F6CLD1_MYCGL	rpl33	50S ribosomal protein L33	0.906	0.855	0.0959	0.643
524	tr|A0A0F6CLD2|A0A0F6CLD2_MYCGL	tr|A0A0F6CLD2|A0A0F6CLD2_MYCGL	GCW_03645	Mutator family transposase	0.753	0.482	0.298	0.556
525	tr|A0A0F6CLD3|A0A0F6CLD3_MYCGL	tr|A0A0F6CLD3|A0A0F6CLD3_MYCGL	GCW_03655	Uncharacterized protein	0.913	0.844	-0.012	0.586
526	tr|A0A0F6CLD5|A0A0F6CLD5_MYCGL	tr|A0A0F6CLD5|A0A0F6CLD5_MYCGL	GCW_03665	Uncharacterized protein	0.0793	0.179	1.99	2.01
527	tr|A0A0F6CLE1|A0A0F6CLE1_MYCGL	tr|A0A0F6CLE1|A0A0F6CLE1_MYCGL	rpoE	DNA-directed RNA polymerase subunit delta	0.838	0.915	-0.128	-0.0207
528	tr|A0A0F6CLE2|A0A0F6CLE2_MYCGL	tr|A0A0F6CLE2|A0A0F6CLE2_MYCGL	fba	Fructose-bisphosphate aldolase	0.818	0.82	-0.115	-0.139
529	tr|A0A0F6CLE3|A0A0F6CLE3_MYCGL	tr|A0A0F6CLE3|A0A0F6CLE3_MYCGL	ychF	Ribosome-binding ATPase YchF	0.51	0.673	-0.375	-0.348
530	tr|A0A0F6CLE4|A0A0F6CLE4_MYCGL	tr|A0A0F6CLE4|A0A0F6CLE4_MYCGL	tdk	Thymidine kinase	0.809	0.92	0.141	0.00379
531	tr|A0A0F6CLE5|A0A0F6CLE5_MYCGL	tr|A0A0F6CLE5|A0A0F6CLE5_MYCGL	rplK	50S ribosomal protein L11	0.882	0.706	0.0504	0.19
532	tr|A0A0F6CLE6|A0A0F6CLE6_MYCGL	tr|A0A0F6CLE6|A0A0F6CLE6_MYCGL	rplA	50S ribosomal protein L1	0.796	0.884	0.15	0.0841
533	tr|A0A0F6CLE7|A0A0F6CLE7_MYCGL	tr|A0A0F6CLE7|A0A0F6CLE7_MYCGL	pth	Peptidyl-tRNA hydrolase	0.89	0.879	-0.173	-0.323
534	tr|A0A0F6CLE9|A0A0F6CLE9_MYCGL	tr|A0A0F6CLE9|A0A0F6CLE9_MYCGL	fruA	PTS fructose transporter subunit IIABC	0.254	0.673	0.505	0.362
535	tr|A0A0F6CLF0|A0A0F6CLF0_MYCGL	tr|A0A0F6CLF0|A0A0F6CLF0_MYCGL	manA	Mannose-6-phosphate isomerase	0.694	0.89	0.331	0.119
536	tr|A0A0F6CLF1|A0A0F6CLF1_MYCGL	tr|A0A0F6CLF1|A0A0F6CLF1_MYCGL	GCW_03750	Uncharacterized protein	0.906	0.884	0.0336	0.143
537	tr|A0A0F6CLF2|A0A0F6CLF2_MYCGL	tr|A0A0F6CLF2|A0A0F6CLF2_MYCGL	csn1	CRISPR-associated endonuclease Cas9	0.746	0.91	0.145	-0.0255
538	tr|A0A0F6CLF3|A0A0F6CLF3_MYCGL	tr|A0A0F6CLF3|A0A0F6CLF3_MYCGL	cas1	CRISPR-associated endonuclease Cas1	0.908	0.918	-0.0373	-0.0226
539	tr|A0A0F6CLF5|A0A0F6CLF5_MYCGL	tr|A0A0F6CLF5|A0A0F6CLF5_MYCGL	GCW_03775	Uncharacterized protein	0.848	0.912	-0.288	-0.0702
540	tr|A0A0F6CLF6|A0A0F6CLF6_MYCGL	tr|A0A0F6CLF6|A0A0F6CLF6_MYCGL	GCW_03780	rRNA methyltransferase	0.797	0.918	-1.14	0.0615
541	tr|A0A0F6CLF7|A0A0F6CLF7_MYCGL	tr|A0A0F6CLF7|A0A0F6CLF7_MYCGL	cysS	Cysteine--tRNA ligase	0.726	0.828	0.265	0.214
542	tr|A0A0F6CLF8|A0A0F6CLF8_MYCGL	tr|A0A0F6CLF8|A0A0F6CLF8_MYCGL	GCW_03800	Peptidase S8	0.869	0.737	0.178	0.486
543	tr|A0A0F6CLF9|A0A0F6CLF9_MYCGL	tr|A0A0F6CLF9|A0A0F6CLF9_MYCGL	GCW_03805	ATPase AAA	0.75	0.855	0.195	0.137
544	tr|A0A0F6CLG2|A0A0F6CLG2_MYCGL	tr|A0A0F6CLG2|A0A0F6CLG2_MYCGL	hsdR	Type I restriction enzyme R Protein	0.898	0.886	0.0747	0.17
545	tr|A0A0F6CLG3|A0A0F6CLG3_MYCGL	tr|A0A0F6CLG3|A0A0F6CLG3_MYCGL	GCW_03835	Uncharacterized protein	0.912	0.841	-0.066	-1.96
546	tr|A0A0F6CLG4|A0A0F6CLG4_MYCGL	tr|A0A0F6CLG4|A0A0F6CLG4_MYCGL	GCW_03840	Uncharacterized protein	0.84	0.622	-0.106	-0.261
547	tr|A0A0F6CLG5|A0A0F6CLG5_MYCGL	tr|A0A0F6CLG5|A0A0F6CLG5_MYCGL	GCW_03845	Uncharacterized protein	0.818	0.901	-0.174	-0.0686
548	tr|A0A0F6CLG6|A0A0F6CLG6_MYCGL	tr|A0A0F6CLG6|A0A0F6CLG6_MYCGL	GCW_03850	Uncharacterized protein	0.888	0.905	0.451	0.364
549	tr|A0A0F6CLG8|A0A0F6CLG8_MYCGL	tr|A0A0F6CLG8|A0A0F6CLG8_MYCGL	GCW_03865	Uncharacterized protein	0.803	0.872	0.248	0.177
550	tr|A0A0F6CLH1|A0A0F6CLH1_MYCGL	tr|A0A0F6CLH1|A0A0F6CLH1_MYCGL	GCW_03900	Putative peptidase (DUF31)	0.0254	0.816	0.409	0.129
551	tr|A0A0F6CLH5|A0A0F6CLH5_MYCGL	tr|A0A0F6CLH5|A0A0F6CLH5_MYCGL	lig	DNA ligase	0.667	0.247	-0.19	-0.361
552	tr|A0A0F6CLH6|A0A0F6CLH6_MYCGL	tr|A0A0F6CLH6|A0A0F6CLH6_MYCGL	msrA	Peptide methionine sulfoxide reductase MsrA	0.839	0.895	0.201	-0.114
553	tr|A0A0F6CLH7|A0A0F6CLH7_MYCGL	tr|A0A0F6CLH7|A0A0F6CLH7_MYCGL	GCW_03935	Helicase SNF2	0.549	0.826	-0.231	-0.138
554	tr|A0A0F6CLH8|A0A0F6CLH8_MYCGL	tr|A0A0F6CLH8|A0A0F6CLH8_MYCGL	GCW_03940	Uncharacterized protein	0.909	0.869	-0.0329	0.278
555	tr|A0A0F6CLH9|A0A0F6CLH9_MYCGL	tr|A0A0F6CLH9|A0A0F6CLH9_MYCGL	GCW_03945	Procyclic acidic repetitive protein (PARP), M-domain IgG blocking protein	0.894	0.914	0.26	0.13
556	tr|A0A0F6CLI0|A0A0F6CLI0_MYCGL	tr|A0A0F6CLI0|A0A0F6CLI0_MYCGL	GCW_03965	Putative peptidase (DUF31)	0.0843	0.654	0.445	0.261
557	tr|A0A0F6CLI1|A0A0F6CLI1_MYCGL	tr|A0A0F6CLI1|A0A0F6CLI1_MYCGL	GCW_03980	M-domain IgG blocking protein	0.657	0.914	0.286	-0.0278
558	tr|A0A0F6CLI2|A0A0F6CLI2_MYCGL	tr|A0A0F6CLI2|A0A0F6CLI2_MYCGL	GCW_03985	Procyclic acidic repetitive protein, M-domain IgG blocking protein	0.908	0.91	0.098	-0.212
559	tr|A0A0F6CLI3|A0A0F6CLI3_MYCGL	tr|A0A0F6CLI3|A0A0F6CLI3_MYCGL	GCW_03990	M-domain IgG blocking protein	0.898	0.891	0.141	-0.287
560	tr|A0A0F6CLI4|A0A0F6CLI4_MYCGL	tr|A0A0F6CLI4|A0A0F6CLI4_MYCGL	GCW_04000	Aldehyde dehydrogenase	0.877	0.916	0.076	0.0156
561	tr|A0A0F6CLI5|A0A0F6CLI5_MYCGL	tr|A0A0F6CLI5|A0A0F6CLI5_MYCGL	GCW_04005	Metal-dependent phosphohydrolase	0.779	0.644	-0.204	-0.34
562	tr|A0A0F6CLI6|A0A0F6CLI6_MYCGL	tr|A0A0F6CLI6|A0A0F6CLI6_MYCGL	gltX	Glutamate--tRNA ligase	0.909	0.804	-0.012	-0.171
563	tr|A0A0F6CLI7|A0A0F6CLI7_MYCGL	tr|A0A0F6CLI7|A0A0F6CLI7_MYCGL	folD	Bifunctional protein FolD	0.907	0.908	-0.0257	-0.057
564	tr|A0A0F6CLI8|A0A0F6CLI8_MYCGL	tr|A0A0F6CLI8|A0A0F6CLI8_MYCGL	lgt	Phosphatidylglycerol--prolipoprotein diacylglyceryl transferase	0.25	0.917	0.56	0.0169
565	tr|A0A0F6CLI9|A0A0F6CLI9_MYCGL	tr|A0A0F6CLI9|A0A0F6CLI9_MYCGL	hprK	HPr kinase/phosphorylase	0.867	0.817	-0.13	-0.256
566	tr|A0A0F6CLJ0|A0A0F6CLJ0_MYCGL	tr|A0A0F6CLJ0|A0A0F6CLJ0_MYCGL	GCW_04035	Uncharacterized protein	0.864	0.859	0.0897	0.123
567	tr|A0A0F6CLJ1|A0A0F6CLJ1_MYCGL	tr|A0A0F6CLJ1|A0A0F6CLJ1_MYCGL	trmE	tRNA modification GTPase MnmE	0.907	0.853	-0.0286	0.219
568	tr|A0A0F6CLJ2|A0A0F6CLJ2_MYCGL	tr|A0A0F6CLJ2|A0A0F6CLJ2_MYCGL	holB	DNA polymerase III subunit delta	0.81	0.914	-0.268	0.0408
569	tr|A0A0F6CLJ3|A0A0F6CLJ3_MYCGL	tr|A0A0F6CLJ3|A0A0F6CLJ3_MYCGL	tmk	Thymidylate kinase	0.818	0.771	0.407	0.614
570	tr|A0A0F6CLJ4|A0A0F6CLJ4_MYCGL	tr|A0A0F6CLJ4|A0A0F6CLJ4_MYCGL	serS	Serine--tRNA ligase	0.809	0.614	-0.108	-0.216
571	tr|A0A0F6CLJ5|A0A0F6CLJ5_MYCGL	tr|A0A0F6CLJ5|A0A0F6CLJ5_MYCGL	gyrA	DNA gyrase subunit A	0.872	0.9	0.0877	0.0634
572	tr|A0A0F6CLJ6|A0A0F6CLJ6_MYCGL	tr|A0A0F6CLJ6|A0A0F6CLJ6_MYCGL	gyrB	DNA gyrase subunit B	0.903	0.92	-0.0245	-0.00242
573	tr|A0A0F6CLJ7|A0A0F6CLJ7_MYCGL	tr|A0A0F6CLJ7|A0A0F6CLJ7_MYCGL	dnaJ_7	Molecular chaperone DnaJ	0.815	0.438	-0.152	-0.39
574	tr|A0A0F6CLJ8|A0A0F6CLJ8_MYCGL	tr|A0A0F6CLJ8|A0A0F6CLJ8_MYCGL	dnaN	DNA polymerase III subunit beta	0.775	0.902	-0.26	-0.0787
575	tr|A0A0F6CLK0|A0A0F6CLK0_MYCGL	tr|A0A0F6CLK0|A0A0F6CLK0_MYCGL	ispE	4-(cytidine 5-diphospho)-2-C-methyl-D-erythritol kinase	0.834	0.8	0.397	0.597
576	tr|A0A0F6CLK6|A0A0F6CLK6_MYCGL	tr|A0A0F6CLK6|A0A0F6CLK6_MYCGL	GCW_00430	Uncharacterized protein	0.819	0.92	-0.235	0.0063
577	tr|A0A0F6CLL2|A0A0F6CLL2_MYCGL	tr|A0A0F6CLL2|A0A0F6CLL2_MYCGL	GCW_00800	Uncharacterized protein	0.879	0.826	0.0805	0.185
578	tr|A0A0F6CLM0|A0A0F6CLM0_MYCGL	tr|A0A0F6CLM0|A0A0F6CLM0_MYCGL	GCW_01470	Uncharacterized protein	0.911	0.899	-0.0142	0.132
579	tr|A0A0F6CLM1|A0A0F6CLM1_MYCGL	tr|A0A0F6CLM1|A0A0F6CLM1_MYCGL	GCW_01475	Uncharacterized protein	0.899	0.793	-0.205	-1.11
580	tr|A0A0F6CLM2|A0A0F6CLM2_MYCGL	tr|A0A0F6CLM2|A0A0F6CLM2_MYCGL	GCW_01500	Elongation factor G	0.877	0.919	0.722	-0.048
581	tr|A0A0F6CLN2|A0A0F6CLN2_MYCGL	tr|A0A0F6CLN2|A0A0F6CLN2_MYCGL	fur	Inorganic ion uptake regulation protein, transcription factor	0.883	0.89	0.124	-0.149
582	tr|A0A0F6CLN7|A0A0F6CLN7_MYCGL	tr|A0A0F6CLN7|A0A0F6CLN7_MYCGL	GCW_02285	Uncharacterized protein	0.905	0.789	-0.0168	0.142
583	tr|A0A0F6CLN8|A0A0F6CLN8_MYCGL	tr|A0A0F6CLN8|A0A0F6CLN8_MYCGL	mtn	5-methylthioadenosine nucleosidase	0.878	0.883	-0.293	0.364
584	tr|A0A0F6CLP4|A0A0F6CLP4_MYCGL	tr|A0A0F6CLP4|A0A0F6CLP4_MYCGL	GCW_02425	Myco_haema domain-containing protein	0.418	0.466	-1.48	-1.64
585	tr|A0A0F6CLP7|A0A0F6CLP7_MYCGL	tr|A0A0F6CLP7|A0A0F6CLP7_MYCGL	vlhA.2.02	VlhA.2.02 variable lipoprotein family protein	0.512	0.907	0.434	0.0601
586	tr|A0A0F6CLQ1|A0A0F6CLQ1_MYCGL	tr|A0A0F6CLQ1|A0A0F6CLQ1_MYCGL	ppnK	NAD kinase	0.861	0.89	0.112	-0.0912
587	tr|A0A0F6CLQ4|A0A0F6CLQ4_MYCGL	tr|A0A0F6CLQ4|A0A0F6CLQ4_MYCGL	GCW_03480	Esterase	0.826	0.76	-0.236	-0.389
588	tr|A0A0F6CLQ5|A0A0F6CLQ5_MYCGL	tr|A0A0F6CLQ5|A0A0F6CLQ5_MYCGL	gidB	Ribosomal RNA small subunit methyltransferase G	0.848	0.675	0.196	0.471
589	tr|A0A0F6CLQ6|A0A0F6CLQ6_MYCGL	tr|A0A0F6CLQ6|A0A0F6CLQ6_MYCGL	GCW_03740	Uncharacterized protein	0.662	0.521	1.12	1.61
590	tr|A0A0F6CLS8|A0A0F6CLS8_MYCGL	tr|A0A0F6CLS8|A0A0F6CLS8_MYCGL	ispF	2-C-methyl-D-erythritol 2,4-cyclodiphosphate synthase	0.578	0.869	-0.439	-0.188
591	tr|A0A0F6CLS9|A0A0F6CLS9_MYCGL	tr|A0A0F6CLS9|A0A0F6CLS9_MYCGL	folA	Bifunctional protein deoxycytidylate deaminase and dihydrofolate reductase	0.859	0.892	0.146	-0.108
592	tr|A0A0F6CLT3|A0A0F6CLT3_MYCGL	tr|A0A0F6CLT3|A0A0F6CLT3_MYCGL	polC	DNA polymerase III PolC-type	0.877	0.832	0.0995	0.213
593	tr|A0A0F6CLT8|A0A0F6CLT8_MYCGL	tr|A0A0F6CLT8|A0A0F6CLT8_MYCGL	GCW_90556	Aromatic cluster surface protein	0.828	0.502	0.205	0.531
594	tr|A0A0F6CLU6|A0A0F6CLU6_MYCGL	tr|A0A0F6CLU6|A0A0F6CLU6_MYCGL	smtA	S-adenosylmethionine-dependent methyltransferases (SAM or AdoMet-MTase), class I	0.877	0.914	0.241	0.0755
595	tr|A0A0F6CLU7|A0A0F6CLU7_MYCGL	tr|A0A0F6CLU7|A0A0F6CLU7_MYCGL	GCW_90677	O-methyltransferase family protein	0.904	0.894	0.228	0.642
596	tr|A0A0F6CLV5|A0A0F6CLV5_MYCGL	tr|A0A0F6CLV5|A0A0F6CLV5_MYCGL	GCW_90995	Heme chaperone HemW	0.819	0.865	0.182	0.156
597	tr|A0A0F6CLV7|A0A0F6CLV7_MYCGL	tr|A0A0F6CLV7|A0A0F6CLV7_MYCGL	smc	Chromosome partition protein Smc	0.879	0.869	-0.0704	-0.111
598	tr|A0A0F6CLW2|A0A0F6CLW2_MYCGL	tr|A0A0F6CLW2|A0A0F6CLW2_MYCGL	GCW_91202	Uncharacterized protein	0.248	0.917	-0.715	0.0238
599	tr|A0A0F6CLW3|A0A0F6CLW3_MYCGL	tr|A0A0F6CLW3|A0A0F6CLW3_MYCGL	hatC	ABC-type phosphate/phosphonate transport system, permease component	0.909	0.863	-0.0341	-0.347
600	tr|A0A0F6CLW5|A0A0F6CLW5_MYCGL	tr|A0A0F6CLW5|A0A0F6CLW5_MYCGL	degV	Uncharacterized protein, DegV family	0.754	0.907	-0.221	-0.0471
601	tr|A0A0F6CLW6|A0A0F6CLW6_MYCGL	tr|A0A0F6CLW6|A0A0F6CLW6_MYCGL	GCW_91421	Uncharacterized protein	0.858	0.703	-0.0892	-0.227
602	tr|A0A0F6CLX0|A0A0F6CLX0_MYCGL	tr|A0A0F6CLX0|A0A0F6CLX0_MYCGL	salX	ATP-binding cassette domain of the transporters involved in export of lipoprotein and macrolide, and cell division protein	0.911	0.817	-0.00848	-0.173
603	tr|A0A0F6CLX5|A0A0F6CLX5_MYCGL	tr|A0A0F6CLX5|A0A0F6CLX5_MYCGL	GCW_91756	Uncharacterized protein	0.867	0.903	-0.175	-0.1
604	tr|A0A0F6CLX6|A0A0F6CLX6_MYCGL	tr|A0A0F6CLX6|A0A0F6CLX6_MYCGL	GCW_91851	Uncharacterized protein	0.787	0.79	-0.225	-0.27
605	tr|A0A0F6CLX7|A0A0F6CLX7_MYCGL	tr|A0A0F6CLX7|A0A0F6CLX7_MYCGL	GCW_91852	Uncharacterized protein	0.769	0.712	-0.213	-0.299
606	tr|A0A0F6CLY4|A0A0F6CLY4_MYCGL	tr|A0A0F6CLY4|A0A0F6CLY4_MYCGL	pheS	Phenylalanine--tRNA ligase alpha subunit	0.867	0.755	0.127	0.323
607	tr|A0A0F6CLY5|A0A0F6CLY5_MYCGL	tr|A0A0F6CLY5|A0A0F6CLY5_MYCGL	pheT	Phenylalanine--tRNA ligase beta subunit	0.893	0.908	0.0507	-0.0421
608	tr|A0A0F6CLY6|A0A0F6CLY6_MYCGL	tr|A0A0F6CLY6|A0A0F6CLY6_MYCGL	GCW_92038	PTS system2C mannitol-specific IIABC component (EIIABC-Mtl) (Mannitol-permease IIABC component) (Phosphotransferase enzyme II2C ABC component)	0.805	0.9	-0.648	-0.242
609	tr|A0A0F6CLZ0|A0A0F6CLZ0_MYCGL	tr|A0A0F6CLZ0|A0A0F6CLZ0_MYCGL	uvrD	DNA helicase	0.904	0.879	0.0341	0.129
610	tr|A0A0F6CLZ1|A0A0F6CLZ1_MYCGL	tr|A0A0F6CLZ1|A0A0F6CLZ1_MYCGL	scpB	Segregation and condensation protein B	0.853	0.91	0.169	-0.051
611	tr|A0A0F6CLZ2|A0A0F6CLZ2_MYCGL	tr|A0A0F6CLZ2|A0A0F6CLZ2_MYCGL	scpA	Segregation and condensation protein A	0.876	0.757	-0.0965	-0.282
612	tr|A0A0F6CLZ3|A0A0F6CLZ3_MYCGL	tr|A0A0F6CLZ3|A0A0F6CLZ3_MYCGL	rnhC	Ribonuclease	0.839	0.916	0.133	0.0162
613	tr|A0A0F6CLZ6|A0A0F6CLZ6_MYCGL	tr|A0A0F6CLZ6|A0A0F6CLZ6_MYCGL	vlhA	Mycoplasma hemagglutinin VlhA	0.448	0.885	0.338	-0.094
614	tr|A0A0F6CLZ8|A0A0F6CLZ8_MYCGL	tr|A0A0F6CLZ8|A0A0F6CLZ8_MYCGL	vlhA	Mycoplasma hemagglutinin VlhA	0.203	0.457	-1.25	-1.13
615	tr|A0A0F6CM02|A0A0F6CM02_MYCGL	tr|A0A0F6CM02|A0A0F6CM02_MYCGL	vlhA	VlhA	0.124	0.902	-0.59	0.0698
616	tr|A0A0F6CM05|A0A0F6CM05_MYCGL	tr|A0A0F6CM05|A0A0F6CM05_MYCGL	vlhA	VlhA	0.316	0.832	3.09	1.39
617	tr|A0A0F6CM08|A0A0F6CM08_MYCGL	tr|A0A0F6CM08|A0A0F6CM08_MYCGL	obgE	GTPase Obg	0.804	0.913	0.18	0.0297
618	tr|A0A0F6CM10|A0A0F6CM10_MYCGL	tr|A0A0F6CM10|A0A0F6CM10_MYCGL	GCW_92659	S-adenosylmethionine synthetase	0.874	0.912	-0.0984	-0.0344
619	tr|A0A0F6CM11|A0A0F6CM11_MYCGL	tr|A0A0F6CM11|A0A0F6CM11_MYCGL	rnc	Ribonuclease 3	0.145	0.593	-0.525	-0.374
620	tr|A0A0F6CM12|A0A0F6CM12_MYCGL	tr|A0A0F6CM12|A0A0F6CM12_MYCGL	GCW_92794	N-acetylmuramoyl-L-alanine amidase	0.612	0.733	0.336	0.314
621	tr|A0A0F6CM14|A0A0F6CM14_MYCGL	tr|A0A0F6CM14|A0A0F6CM14_MYCGL	topJ	EAGR-box protein, DnaJ-like protein, may be involved in terminal organelle assembly	0.839	0.89	0.1	-0.0643
622	tr|A0A0F6CM21|A0A0F6CM21_MYCGL	tr|A0A0F6CM21|A0A0F6CM21_MYCGL	GCW_93171	ECF-type riboflavin transporter, S component	0.827	0.9	-1.35	-0.582
623	tr|A0A0F6CM23|A0A0F6CM23_MYCGL	tr|A0A0F6CM23|A0A0F6CM23_MYCGL	vlhA	VlhA	0.325	0.811	-2.78	-1.42
624	tr|A0A0F6CM26|A0A0F6CM26_MYCGL	tr|A0A0F6CM26|A0A0F6CM26_MYCGL	vlhA	VlhA	0.484	0.554	-0.891	0.959
625	tr|A0A0F6CM27|A0A0F6CM27_MYCGL	tr|A0A0F6CM27|A0A0F6CM27_MYCGL	vlhA	VlhA	0.851	0.422	0.151	-0.519
626	tr|A0A0F6CM38|A0A0F6CM38_MYCGL	tr|A0A0F6CM38|A0A0F6CM38_MYCGL	GCW_93852	Uncharacterized protein	0.298	0.895	0.814	0.154
627	tr|A0A0F6CM45|A0A0F6CM45_MYCGL	tr|A0A0F6CM45|A0A0F6CM45_MYCGL	tatD	TatD like protein	0.894	0.904	0.0485	0.0508
